# Supplementary material for: National, Regional, and Global Trends in Infertility Prevalence Since 1990: A Systematic Analysis of 277 Health Surveys
Source: PLoS Med. 2012 Dec 18;9(12):e1001356. doi: 10.1371/journal.pmed.1001356 (PMC3525527; doi:10.1371/journal.pmed.1001356)
Supplement: Dataset S2 — Prevalence of primary and secondary infertility by country, 1990 and 2010. (XLSX) [file pmed.1001356.s002.xlsx]

## Sheet: Primary - child-seeking
Prevalence of primary infertility among women exposed to the risk of pregnancy
County		Year	Total population, women aged 20-44 years	Prevalence of primary infertility			Age-standardized prevalence of primary infertility
ISO3 code	Country name			Estimate	Lower 95% uncertainty interval	Upper 95% uncertainty interval	Estimate	Lower 95% uncertainty interval	Upper 95% uncertainty interval
BRN	Brunei Darussalam	1990	48806	0.0137933	0.0056279	0.0278581	0.0138364	0.0056381	0.0279328
JPN	Japan	1990	21800000	0.0133896	0.0052948	0.0268441	0.0136366	0.0054002	0.0273568
KOR	Republic of Korea	1990	9041102	0.0105958	0.0062502	0.0170159	0.0104801	0.0061849	0.016838
SGP	Singapore	1990	746131	0.0138012	0.0057189	0.0281764	0.0138095	0.0057205	0.0281739
BRN	Brunei Darussalam	2010	91314	0.0133606	0.004328	0.0293559	0.0136267	0.0044145	0.0299012
JPN	Japan	2010	20100000	0.0130998	0.0045669	0.0295275	0.0135993	0.0047648	0.0306086
KOR	Republic of Korea	2010	9085255	0.0099639	0.0045029	0.0199177	0.0103174	0.0046785	0.0206252
SGP	Singapore	2010	946395	0.0131297	0.0043699	0.0300292	0.0135792	0.0045373	0.0311073
ARM	Armenia	1990	705400	0.0131777	0.0081702	0.0193617	0.0132057	0.0081888	0.0193919
AZE	Azerbaijan	1990	1370871	0.0183629	0.0110343	0.0290219	0.0178153	0.0107107	0.0281734
GEO	Georgia	1990	1017993	0.0146427	0.0068821	0.0261701	0.0147476	0.0069305	0.0263608
KAZ	Kazakhstan	1990	3129493	0.0149474	0.0101811	0.0210608	0.0149668	0.0101976	0.0210522
KGZ	Kyrgyzstan	1990	761589	0.0127388	0.007791	0.0197097	0.0125369	0.0076647	0.0193919
MNG	Mongolia	1990	367975	0.0163939	0.0079451	0.0299281	0.0156558	0.007573	0.028637
TJK	Tajikistan	1990	861779	0.0158133	0.0075774	0.028842	0.0151888	0.007276	0.0277542
TKM	Turkmenistan	1990	643821	0.0156716	0.0076364	0.0282412	0.0152197	0.007409	0.0273133
UZB	Uzbekistan	1990	3505111	0.0135233	0.0083761	0.0202771	0.0130992	0.0081221	0.0196448
ARM	Armenia	2010	597414	0.0170375	0.0118505	0.0248679	0.0166262	0.0115643	0.0242973
AZE	Azerbaijan	2010	1912075	0.0223579	0.0146207	0.032191	0.0218948	0.0143391	0.0315235
GEO	Georgia	2010	796644	0.0187524	0.0093115	0.0338946	0.0186781	0.0092732	0.0337581
KAZ	Kazakhstan	2010	3179008	0.0191198	0.0121842	0.0289421	0.0188317	0.0119949	0.0285127
KGZ	Kyrgyzstan	2010	1044406	0.0164278	0.0098295	0.0264141	0.0157976	0.0094702	0.0253902
MNG	Mongolia	2010	601551	0.0202242	0.009921	0.0376344	0.0197651	0.0096971	0.0368162
TJK	Tajikistan	2010	1261274	0.019845	0.0095601	0.0357884	0.0189125	0.0091104	0.0341821
TKM	Turkmenistan	2010	1016649	0.0193996	0.0100019	0.0348793	0.0189094	0.009746	0.0339251
UZB	Uzbekistan	2010	5446519	0.0169777	0.0100047	0.0271468	0.0164822	0.0096935	0.0263726
CHN	China	1990	222000000	0.0129247	0.0108372	0.015419	0.0125512	0.0105315	0.0149907
HKG	China (Hong Kong SAR)	1990	1275108	0.0177334	0.0088532	0.0306021	0.017908	0.0089556	0.0309684
MAC	China (Macao SAR)	1990	91641	0.0187137	0.0091129	0.0330682	0.0185579	0.0090331	0.0328088
PRK	Democratic People's Republic of Korea	1990	3819800	0.0189691	0.0090633	0.0336138	0.0182739	0.0087324	0.0323512
TWN	Taiwan	1990	4137632	0.0183166	0.0089608	0.0319704	0.0181685	0.0088837	0.0316934
CHN	China	2010	269000000	0.012822	0.0097023	0.0167466	0.0129473	0.0097941	0.0169087
HKG	China (Hong Kong SAR)	2010	1442541	0.0177127	0.0088084	0.0316597	0.0184597	0.0091869	0.0329767
MAC	China (Macao SAR)	2010	128931	0.0184954	0.0086503	0.0326697	0.0189302	0.0088658	0.0333949
PRK	Democratic People's Republic of Korea	2010	4621049	0.0183524	0.0088295	0.0331778	0.0186692	0.0089771	0.0337578
TWN	Taiwan	2010	4526507	0.0180269	0.0085659	0.0322306	0.0184997	0.0088051	0.0330573
AFG	Afghanistan	1990	1912520	0.0290086	0.0153643	0.0493261	0.027985	0.0148242	0.0476605
BGD	Bangladesh	1990	16400000	0.0211327	0.0178809	0.0247819	0.0200527	0.0169964	0.0234949
BTN	Bhutan	1990	83780	0.0279184	0.0145076	0.0478068	0.0272043	0.0141289	0.0465713
IND	India	1990	147000000	0.0296867	0.0244634	0.035694	0.0290096	0.0238931	0.0348847
NPL	Nepal	1990	3017931	0.023208	0.0196284	0.0274914	0.0224784	0.0190057	0.0266192
PAK	Pakistan	1990	17000000	0.0373547	0.0311431	0.0438161	0.0361408	0.0301067	0.0424104
AFG	Afghanistan	2010	4667212	0.024588	0.0127873	0.0436639	0.0235883	0.0122672	0.0419447
BGD	Bangladesh	2010	29700000	0.0164431	0.0135425	0.0197583	0.0161684	0.0133277	0.0194116
BTN	Bhutan	2010	135335	0.0228618	0.0118908	0.0399365	0.0220492	0.0114568	0.0385645
IND	India	2010	226000000	0.0236031	0.0188129	0.0286978	0.0232782	0.0185513	0.0283186
NPL	Nepal	2010	5504228	0.0186542	0.0152817	0.0223041	0.0182386	0.0149328	0.0218017
PAK	Pakistan	2010	31400000	0.0302494	0.0238381	0.0375807	0.0292216	0.0230465	0.0362355
IDN	Indonesia	1990	32800000	0.0271519	0.0236375	0.0311119	0.0262254	0.0228238	0.0300123
KHM	Cambodia	1990	1726783	0.0156846	0.0121638	0.0197253	0.0152674	0.0118264	0.01922
LAO	Lao People's Democratic Republic	1990	653839	0.0210626	0.0110318	0.0345593	0.0202369	0.0105722	0.0331827
LKA	Sri Lanka	1990	3287496	0.0178171	0.012497	0.0240962	0.0175108	0.0122897	0.0236935
MDV	Maldives	1990	30633	0.0241138	0.0172054	0.0332918	0.0227844	0.0161955	0.0315018
MMR	Myanmar	1990	7158896	0.01998	0.0106816	0.0342015	0.0194443	0.0103848	0.0333468
MYS	Malaysia	1990	3394366	0.0151274	0.0104015	0.0207877	0.0148417	0.0101953	0.0204708
PHL	Philippines	1990	10600000	0.0213722	0.0180901	0.0253577	0.0207498	0.0175801	0.0245826
THA	Thailand	1990	11500000	0.0225456	0.0154847	0.0312343	0.0221041	0.0151666	0.0306344
TLS	Timor-Leste	1990	134719	0.0190068	0.0131478	0.0271893	0.0183845	0.0127264	0.0263053
VNM	Viet Nam	1990	12200000	0.0119608	0.008694	0.0160865	0.0115641	0.0084072	0.0155817
IDN	Indonesia	2010	49600000	0.0268218	0.0222615	0.0324868	0.0268387	0.0222798	0.0325062
KHM	Cambodia	2010	2700144	0.0164589	0.0133151	0.0202998	0.0158974	0.0128378	0.0196005
LAO	Lao People's Democratic Republic	2010	1153956	0.021902	0.0117902	0.0374175	0.0211471	0.0113759	0.0361401
LKA	Sri Lanka	2010	3975404	0.0180101	0.0120982	0.0253578	0.0181103	0.0121587	0.0255152
MDV	Maldives	2010	69409	0.0249242	0.0179212	0.0346821	0.0239744	0.017258	0.0333639
MMR	Myanmar	2010	10100000	0.0202087	0.0107215	0.034399	0.020166	0.0106977	0.0343348
MYS	Malaysia	2010	5282778	0.0152039	0.0096159	0.0223147	0.0150794	0.0095424	0.0221275
PHL	Philippines	2010	16900000	0.0223066	0.0181406	0.0270465	0.0218141	0.0177168	0.0264632
THA	Thailand	2010	13700000	0.0225517	0.014656	0.0320867	0.0230068	0.0149463	0.0327202
TLS	Timor-Leste	2010	154657	0.0198468	0.0140376	0.0274199	0.0188789	0.0133742	0.0261248
VNM	Viet Nam	2010	18500000	0.0122918	0.0088108	0.0164394	0.0121503	0.0087133	0.0162543
AUS	Australia	1990	3350690	0.0195455	0.0059186	0.0438684	0.019736	0.0059755	0.0442993
NZL	New Zealand	1990	661955	0.0194064	0.00633	0.0436215	0.0195052	0.006359	0.0438197
AUS	Australia	2010	3935996	0.0191891	0.0057458	0.0433778	0.0193865	0.0058053	0.043815
NZL	New Zealand	2010	759593	0.0185735	0.0056238	0.0416862	0.0188096	0.0057003	0.0422665
ATG	Antigua and Barbuda	1990	11863	0.0256425	0.0128268	0.0442791	0.0249325	0.0124579	0.0428875
BHS	Bahamas	1990	51215	0.0258297	0.0128666	0.0446697	0.0253325	0.0126025	0.0438464
BLZ	Belize	1990	30861	0.0242425	0.0158633	0.0345621	0.0229654	0.0150367	0.0327133
BRB	Barbados	1990	54938	0.0268139	0.0139502	0.0455425	0.0266355	0.0138575	0.0452178
CUB	Cuba	1990	2138337	0.0261465	0.0132434	0.044664	0.0253608	0.0128402	0.0433792
DMA	Dominica	1990	13528	0.0272905	0.0137473	0.0465715	0.0265362	0.013335	0.0453503
DOM	Dominican Republic	1990	1268920	0.0265202	0.0220973	0.0313678	0.0255752	0.0212916	0.0302627
GRD	Grenada	1990	14536	0.0272656	0.013936	0.0455628	0.0266328	0.0136253	0.0445033
GUY	Guyana	1990	141994	0.0258709	0.0178859	0.0362379	0.0249533	0.0172169	0.0349667
HTI	Haiti	1990	1165516	0.0317984	0.0257504	0.0383598	0.0307938	0.0249523	0.0371402
JAM	Jamaica	1990	423054	0.0276119	0.0181659	0.0393969	0.026518	0.0174393	0.0378704
LCA	Saint Lucia	1990	23550	0.0269266	0.0136173	0.0469148	0.0259641	0.0131372	0.0453074
PRI	Puerto Rico	1990	670622	0.0253713	0.0132208	0.0439049	0.0253827	0.0132264	0.0439246
SUR	Suriname	1990	74816	0.0279664	0.0142656	0.0462977	0.0270673	0.0138125	0.0448215
TTO	Trinidad and Tobago	1990	234127	0.0325278	0.0249682	0.04196	0.0320111	0.0245349	0.0412785
VCT	Saint Vincent and the Grenadines	1990	18040	0.0276443	0.0142807	0.0474305	0.0265	0.0136888	0.0453028
ATG	Antigua and Barbuda	2010	17722	0.0227632	0.0110068	0.0394011	0.0231388	0.0111952	0.0400172
BHS	Bahamas	2010	68519	0.0233215	0.0115972	0.0414941	0.0233552	0.0116107	0.0415503
BLZ	Belize	2010	57898	0.0218129	0.0137798	0.0322827	0.02121	0.0134069	0.0313878
BRB	Barbados	2010	48581	0.0238103	0.0121373	0.0409089	0.0242029	0.0123402	0.0416202
CUB	Cuba	2010	2097016	0.02276	0.0114659	0.0399035	0.023306	0.0117618	0.0408302
DMA	Dominica	2010	13536	0.0237238	0.0116986	0.0413692	0.0241154	0.0119001	0.0420265
DOM	Dominican Republic	2010	1839056	0.0233941	0.01868	0.0286196	0.023062	0.0184254	0.0281865
GRD	Grenada	2010	19806	0.0254889	0.0127734	0.0431018	0.0242014	0.0121102	0.0408864
GUY	Guyana	2010	137436	0.0224813	0.0145671	0.0333543	0.0225356	0.0146042	0.0334236
HTI	Haiti	2010	1830740	0.029053	0.0230265	0.0356431	0.0279523	0.0221405	0.0343233
JAM	Jamaica	2010	504850	0.0245655	0.0153865	0.0363131	0.0245662	0.0153741	0.0363122
LCA	Saint Lucia	2010	36090	0.0242782	0.0122157	0.0433753	0.0239302	0.0120199	0.0427907
PRI	Puerto Rico	2010	677170	0.0231074	0.0116898	0.0415371	0.0232929	0.0117871	0.0418762
SUR	Suriname	2010	98754	0.0251559	0.0129905	0.0423946	0.0249899	0.0129045	0.0420976
TTO	Trinidad and Tobago	2010	287698	0.0298117	0.0216529	0.0403448	0.0294899	0.0214167	0.0399134
VCT	Saint Vincent and the Grenadines	2010	20474	0.0243807	0.0123641	0.0419497	0.0240813	0.0122067	0.0414648
ALB	Albania	1990	599992	0.0119351	0.0072345	0.0180602	0.0116229	0.0070335	0.0176015
BGR	Bulgaria	1990	1520669	0.0121066	0.0057884	0.0219265	0.0123512	0.0059126	0.0223684
BIH	Bosnia and Herzegovina	1990	855854	0.0132893	0.0065374	0.0251607	0.0132746	0.006529	0.02514
CZE	Czech Republic	1990	1831850	0.0134799	0.0080722	0.0218787	0.0138399	0.0082956	0.0224826
HRV	Croatia	1990	815400	0.0126907	0.0060171	0.0245388	0.0129765	0.0061691	0.0250713
HUN	Hungary	1990	1812097	0.0121503	0.0059947	0.0218487	0.0124727	0.0061509	0.0224459
MKD	Macedonia (Former Yugoslav Republic of)	1990	363000	0.0128915	0.0061256	0.0234718	0.0129325	0.0061434	0.0235538
MNE	Montenegro	1990	111382	0.0126238	0.0059546	0.0229196	0.0126962	0.0059867	0.0230474
POL	Poland	1990	7099019	0.0070425	0.00428	0.0106902	0.0072599	0.0044081	0.0110179
ROU	Romania	1990	4059711	0.0124115	0.0060214	0.0227554	0.0123869	0.0060197	0.0227015
SRB	Serbia	1990	1701112	0.0127129	0.0057478	0.0243562	0.0129256	0.0058408	0.0247562
SVK	Slovakia	1990	970225	0.0122852	0.0058041	0.0222566	0.0124843	0.0058914	0.0226356
SVN	Slovenia	1990	362168	0.0137128	0.0084484	0.0209914	0.0139389	0.0085854	0.021336
ALB	Albania	2010	613960	0.0146623	0.0102825	0.0200132	0.0143905	0.0100824	0.0196519
BGR	Bulgaria	2010	1312499	0.015331	0.0070834	0.0295657	0.0156397	0.0072279	0.0301237
BIH	Bosnia and Herzegovina	2010	720627	0.016131	0.0074532	0.0297104	0.0163324	0.00755	0.0300563
CZE	Czech Republic	2010	1921236	0.0172533	0.0098299	0.0289456	0.0177052	0.0101004	0.0297746
HRV	Croatia	2010	739244	0.0157166	0.0070834	0.0297877	0.0160317	0.0072424	0.0303814
HUN	Hungary	2010	1790311	0.0154299	0.007186	0.029012	0.0158413	0.0073819	0.0298008
MKD	Macedonia (Former Yugoslav Republic of)	2010	382723	0.0159451	0.0075327	0.0295665	0.0160847	0.0075946	0.0298458
MNE	Montenegro	2010	114758	0.0158502	0.0076256	0.0296968	0.0159063	0.0076556	0.0297963
POL	Poland	2010	7055315	0.0093969	0.0050288	0.0166679	0.0094178	0.0050446	0.0166977
ROU	Romania	2010	4208905	0.0153206	0.0071572	0.0296982	0.0155736	0.0072887	0.0302055
SRB	Serbia	2010	1744876	0.0160026	0.0073549	0.0312927	0.0161772	0.0074336	0.0316465
SVK	Slovakia	2010	1057224	0.0154599	0.0070257	0.0286472	0.0156212	0.007101	0.0289765
SVN	Slovenia	2010	353876	0.0170809	0.0095493	0.0285173	0.017506	0.0097917	0.0292815
BLR	Belarus	1990	1877708	0.0230061	0.011185	0.0414614	0.0233844	0.011359	0.0421543
EST	Estonia	1990	280205	0.023285	0.0109751	0.0433378	0.0237972	0.011222	0.0442561
LTU	Lithuania	1990	673391	0.0204298	0.0123068	0.0308876	0.020587	0.0124079	0.0311459
LVA	Latvia	1990	468815	0.0230093	0.0111988	0.043425	0.0232958	0.011326	0.0439375
MDA	Moldova	1990	822914	0.0263788	0.0179558	0.0363407	0.0269533	0.0183354	0.0371105
RUS	Russian Federation	1990	27800000	0.022498	0.0104907	0.0404993	0.0231376	0.0107826	0.041616
UKR	Ukraine	1990	9123935	0.0258828	0.016561	0.0367361	0.026389	0.0168841	0.037431
BLR	Belarus	2010	1832751	0.0294957	0.014498	0.051716	0.0296022	0.0145432	0.0518979
EST	Estonia	2010	240767	0.0301279	0.0140018	0.057326	0.0301823	0.0140291	0.0574338
LTU	Lithuania	2010	601830	0.0262045	0.0154231	0.0418112	0.026224	0.0154373	0.0418375
LVA	Latvia	2010	411264	0.0295622	0.0138605	0.056604	0.0295403	0.0138486	0.0565592
MDA	Moldova	2010	676652	0.034671	0.0249541	0.0481466	0.0338739	0.0243437	0.0470762
RUS	Russian Federation	2010	27700000	0.0290661	0.0135469	0.0528331	0.0289973	0.0135198	0.0527
UKR	Ukraine	2010	8505447	0.0329448	0.0240269	0.0444996	0.0331303	0.0241622	0.0447496
AND	Andorra	1990	9450	0.0215013	0.0112746	0.0369328	0.0213754	0.011209	0.0367182
AUT	Austria	1990	1445226	0.0221732	0.0118873	0.0379887	0.022118	0.011858	0.0378693
BEL	Belgium	1990	1837513	0.0283052	0.0191699	0.0402829	0.0286343	0.0194202	0.0407655
CHE	Switzerland	1990	1279589	0.0214227	0.0110898	0.0369125	0.0216545	0.0112252	0.037319
CYP	Cyprus	1990	142854	0.0212385	0.0112195	0.0361002	0.0212007	0.0111996	0.0360405
DEU	Germany	1990	14500000	0.0200541	0.0129716	0.0306419	0.0199816	0.0129281	0.0305283
DNK	Denmark	1990	949780	0.0203056	0.012238	0.0311296	0.0205112	0.0123589	0.0314105
ESP	Spain	1990	6963284	0.0190557	0.0133051	0.0259801	0.0189437	0.0132279	0.0258283
FIN	Finland	1990	956735	0.0248573	0.017755	0.0336545	0.0254853	0.0182106	0.0344987
FRA	France	1990	10600000	0.021686	0.0115722	0.0379385	0.0219584	0.0117117	0.0383784
GBR	United Kingdom	1990	10600000	0.0212847	0.0109267	0.0361643	0.0213287	0.0109508	0.0362482
GRC	Greece	1990	1780389	0.0221621	0.0113816	0.0389343	0.0222179	0.0114126	0.0390365
IRL	Ireland	1990	613993	0.0213183	0.0107586	0.0362321	0.0213782	0.010789	0.0363306
ISL	Iceland	1990	48394	0.0216067	0.0114912	0.0377355	0.0216206	0.0115042	0.0377499
ISR	Israel	1990	790841	0.0213274	0.010673	0.0364639	0.0213538	0.0106927	0.0365206
ITA	Italy	1990	10400000	0.0173473	0.0122592	0.0238808	0.0173408	0.012255	0.0238762
LUX	Luxembourg	1990	74231	0.0215704	0.0115995	0.0379288	0.0219006	0.0117834	0.0385108
MLT	Malta	1990	72947	0.0207717	0.0105216	0.0347027	0.0214569	0.0108697	0.0356836
NLD	Netherlands	1990	2977799	0.0216963	0.0114372	0.0381792	0.0218253	0.0115133	0.0383924
NOR	Norway	1990	778370	0.0207958	0.0105459	0.0368425	0.0209202	0.0106077	0.0370541
PRT	Portugal	1990	1764646	0.0220287	0.015806	0.0299267	0.0220881	0.0158467	0.0300088
SWE	Sweden	1990	1482688	0.0207043	0.0111809	0.0358839	0.02098	0.0113512	0.0363633
AND	Andorra	2010	15754	0.0199603	0.0094032	0.0375026	0.0208403	0.0098082	0.0390549
AUT	Austria	2010	1441953	0.0212123	0.0101017	0.0393787	0.0217701	0.0103384	0.0404025
BEL	Belgium	2010	1745875	0.0273732	0.015884	0.0429268	0.0280502	0.0162896	0.0439375
CHE	Switzerland	2010	1329228	0.0209367	0.0098585	0.0388378	0.0216248	0.0101817	0.0400146
CYP	Cyprus	2010	208435	0.020549	0.0094062	0.0373568	0.0205888	0.0094209	0.0374453
DEU	Germany	2010	13200000	0.0191329	0.0107266	0.0318116	0.0195666	0.0109898	0.0325747
DNK	Denmark	2010	886726	0.0198472	0.010842	0.0332758	0.0203843	0.0111163	0.0341457
ESP	Spain	2010	8553943	0.017212	0.0106709	0.0263941	0.017975	0.0111766	0.0275634
FIN	Finland	2010	817073	0.0246838	0.0145446	0.0383256	0.0250423	0.0147514	0.0388688
FRA	France	2010	10200000	0.0210186	0.0098919	0.0395933	0.0213778	0.0100564	0.0402853
GBR	United Kingdom	2010	10500000	0.020667	0.0094317	0.0380972	0.0209894	0.0095794	0.0386781
GRC	Greece	2010	1991775	0.0206371	0.0095625	0.039514	0.0214487	0.0099314	0.0409878
IRL	Ireland	2010	842869	0.0204247	0.0092616	0.037623	0.0208929	0.009503	0.0384417
ISL	Iceland	2010	55438	0.0209441	0.010078	0.0382132	0.0210772	0.0101415	0.0384181
ISR	Israel	2010	1289316	0.0208379	0.0091248	0.0387584	0.0208944	0.0091512	0.0388653
ITA	Italy	2010	10100000	0.0162055	0.0097979	0.0247417	0.0169451	0.0102276	0.0258329
LUX	Luxembourg	2010	92117	0.0207244	0.0099616	0.0378167	0.0214551	0.0103415	0.0392532
MLT	Malta	2010	71143	0.0209097	0.0095223	0.0390682	0.0209356	0.0095338	0.0391289
NLD	Netherlands	2010	2701428	0.0207382	0.0096075	0.0401419	0.0213165	0.0098654	0.0411494
NOR	Norway	2010	809932	0.019844	0.0092973	0.0371722	0.020325	0.0095243	0.0380753
PRT	Portugal	2010	1886590	0.0205438	0.0112227	0.0346428	0.0213159	0.0116573	0.0359932
SWE	Sweden	2010	1503332	0.0204396	0.009773	0.0382344	0.0207354	0.0099353	0.0387397
BOL	Bolivia	1990	1107977	0.0098249	0.0079645	0.0120876	0.0095334	0.0077295	0.0117222
ECU	Ecuador	1990	1774552	0.0109138	0.0087182	0.0135926	0.0105721	0.0084338	0.0131544
PER	Peru	1990	3770586	0.0091719	0.0074489	0.0110688	0.0088824	0.0072256	0.0107218
BOL	Bolivia	2010	1752051	0.0087934	0.0070966	0.0107894	0.0085952	0.0069305	0.0105429
ECU	Ecuador	2010	2747366	0.0097791	0.0076029	0.0122034	0.0096544	0.0074994	0.0120368
PER	Peru	2010	5543150	0.0081385	0.0063764	0.0102376	0.0080422	0.0063034	0.0101149
COL	Colombia	1990	6382337	0.0167638	0.0142961	0.0195914	0.0162809	0.0138873	0.0190341
CRI	Costa Rica	1990	576743	0.0156417	0.010387	0.0225945	0.0152932	0.0101504	0.0220674
GTM	Guatemala	1990	1334398	0.0119604	0.0087607	0.0155731	0.0115272	0.0084542	0.01502
HND	Honduras	1990	771005	0.0138257	0.0107244	0.0170873	0.013219	0.0102204	0.0163106
MEX	Mexico	1990	14600000	0.0122415	0.0091911	0.016107	0.011776	0.0088273	0.0154618
NIC	Nicaragua	1990	638056	0.0128752	0.0097034	0.0167362	0.0123743	0.0093172	0.0160551
PAN	Panama	1990	439797	0.0124769	0.008337	0.0179187	0.0120829	0.0080729	0.0173393
SLV	El Salvador	1990	878811	0.0115458	0.0089728	0.0144343	0.0110797	0.0086108	0.0138739
VEN	Venezuela (Bolivarian Republic of)	1990	3588059	0.0133967	0.0087754	0.0196586	0.0130725	0.0085618	0.0191995
COL	Colombia	2010	9018195	0.0151344	0.0126092	0.0178893	0.015073	0.0125572	0.0178156
CRI	Costa Rica	2010	913606	0.0142318	0.0090815	0.0210577	0.0140444	0.0089667	0.0207773
GTM	Guatemala	2010	2489109	0.0109638	0.0077624	0.0145424	0.0106167	0.0075228	0.014106
HND	Honduras	2010	1388245	0.0124344	0.0095757	0.0155473	0.0120432	0.0092913	0.0150766
MEX	Mexico	2010	22200000	0.0106939	0.0075828	0.0145329	0.010665	0.0075636	0.0144977
NIC	Nicaragua	2010	1100139	0.0117025	0.0088182	0.015265	0.0113699	0.0085684	0.0148028
PAN	Panama	2010	664841	0.0111293	0.0070258	0.0164622	0.0111245	0.0070227	0.0164548
SLV	El Salvador	2010	1194261	0.0103237	0.0079813	0.0132013	0.0100808	0.0077874	0.0128837
VEN	Venezuela (Bolivarian Republic of)	2010	5522082	0.0120416	0.0075488	0.0180296	0.0118935	0.0074572	0.0178114
ARG	Argentina	1990	5543327	0.0192247	0.0069278	0.0443228	0.01921	0.0069225	0.0442903
CHL	Chile	1990	2614130	0.0194025	0.0066036	0.0447758	0.0191292	0.0065121	0.0441669
URY	Uruguay	1990	528700	0.0196531	0.0066635	0.0462432	0.0196575	0.006666	0.0462676
ARG	Argentina	2010	7377629	0.0178095	0.0062338	0.0416762	0.0177719	0.0062248	0.0415803
CHL	Chile	2010	3193049	0.0176135	0.0057684	0.0424069	0.0175837	0.0057613	0.0423801
URY	Uruguay	2010	577893	0.0180748	0.0060532	0.0425651	0.0181822	0.0060934	0.0428135
BRA	Brazil	1990	28300000	0.0184306	0.0142442	0.0233443	0.0180706	0.0139664	0.0228986
PRY	Paraguay	1990	703802	0.0213545	0.0155795	0.0281188	0.0206882	0.015109	0.0272578
BRA	Brazil	2010	39200000	0.0163533	0.0121189	0.0216069	0.0163464	0.0121162	0.0215943
PRY	Paraguay	2010	1170324	0.0194241	0.0137493	0.0264729	0.0188439	0.0133578	0.0257016
ARE	United Arab Emirates	1990	243154	0.0244054	0.0126091	0.0420771	0.0245189	0.0126706	0.0423653
BHR	Bahrain	1990	87717	0.0248588	0.0131999	0.0435525	0.0244958	0.0129747	0.0429837
DZA	Algeria	1990	4055537	0.0232997	0.0176196	0.0299412	0.0223478	0.0169129	0.0287821
EGY	Egypt	1990	9375821	0.0292244	0.0257538	0.0331522	0.0286042	0.0252015	0.0324485
IRN	Iran (Islamic Republic of)	1990	8488443	0.0263853	0.0142451	0.0448955	0.025519	0.0137395	0.0434049
IRQ	Iraq	1990	2628040	0.0273016	0.014657	0.0459207	0.0259514	0.0139477	0.0437733
JOR	Jordan	1990	446547	0.0291167	0.0240334	0.0346482	0.0274299	0.0226499	0.0326186
KWT	Kuwait	1990	399765	0.0258084	0.0141697	0.0442203	0.0252161	0.0138329	0.043281
LBN	Lebanon	1990	555461	0.0272036	0.0207917	0.0351798	0.0265131	0.0203101	0.0342759
LBY	Libyan Arab Jamahiriya	1990	635537	0.0270367	0.0187773	0.0364885	0.025675	0.0178421	0.0347553
MAR	Morocco	1990	4293180	0.0345224	0.0291679	0.0403309	0.0335192	0.0283298	0.0391805
OMN	Oman	1990	236780	0.0267558	0.0139437	0.0443572	0.0260884	0.0136087	0.0431966
PSE	Occupied Palestinian Territory	1990	310591	0.025525	0.0137408	0.0431211	0.024258	0.0130493	0.0409706
QAT	Qatar	1990	63967	0.0244128	0.0130902	0.0412271	0.0246422	0.0132086	0.0415999
SAU	Saudi Arabia	1990	2294133	0.0266968	0.0145502	0.0457408	0.0258152	0.0140575	0.0443409
SYR	Syrian Arab Republic	1990	1857064	0.0217104	0.0173357	0.0264977	0.0206939	0.0165315	0.0252989
TUN	Tunisia	1990	1423484	0.0270285	0.0215715	0.0332329	0.0261517	0.0209282	0.0321303
TUR	Turkey	1990	9804430	0.0257637	0.0211663	0.0306459	0.0251242	0.0206511	0.0298947
YEM	Yemen	1990	1658958	0.0309761	0.0241937	0.0387849	0.0297539	0.0232931	0.0372556
ARE	United Arab Emirates	2010	1259902	0.0237276	0.012212	0.0409922	0.0234132	0.0120711	0.040446
BHR	Bahrain	2010	232985	0.0234698	0.0123428	0.0417567	0.0234354	0.0123261	0.0416686
DZA	Algeria	2010	7573851	0.0220719	0.0164642	0.0288287	0.0217258	0.0162042	0.0283742
EGY	Egypt	2010	15200000	0.028418	0.0240044	0.0334662	0.0276288	0.023361	0.0325545
IRN	Iran (Islamic Republic of)	2010	17100000	0.0252927	0.0130818	0.0425964	0.0245127	0.0126696	0.0412395
IRQ	Iraq	2010	5295070	0.0265881	0.0144767	0.0450048	0.0259199	0.0140961	0.0438752
JOR	Jordan	2010	1126787	0.0271111	0.0226632	0.0322732	0.0261294	0.0219255	0.0311358
KWT	Kuwait	2010	517244	0.0243579	0.0130583	0.0418742	0.0244774	0.0131341	0.0420915
LBN	Lebanon	2010	868531	0.025482	0.0192003	0.0335542	0.0255642	0.0192637	0.0336599
LBY	Libyan Arab Jamahiriya	2010	1369810	0.0248265	0.0170163	0.0349572	0.0247873	0.0169963	0.0348624
MAR	Morocco	2010	6609684	0.0336266	0.0267716	0.0413932	0.0331766	0.0263977	0.0408306
OMN	Oman	2010	502377	0.0257793	0.0135028	0.0427203	0.024938	0.0130198	0.0413763
PSE	Occupied Palestinian Territory	2010	658667	0.0240757	0.0127848	0.0410486	0.0233076	0.0123843	0.0397381
QAT	Qatar	2010	230487	0.0234493	0.0123116	0.0396757	0.0237306	0.0124821	0.0401607
SAU	Saudi Arabia	2010	5061035	0.0248426	0.0133827	0.0431777	0.0245663	0.0132306	0.042689
SYR	Syrian Arab Republic	2010	3613925	0.0203807	0.0157319	0.0257434	0.0199328	0.0153667	0.025186
TUN	Tunisia	2010	2212832	0.025562	0.0199961	0.0324242	0.0253239	0.0198162	0.0321383
TUR	Turkey	2010	14700000	0.0242326	0.0190243	0.0299887	0.0242338	0.0190202	0.0299928
YEM	Yemen	2010	3869641	0.0316848	0.0240898	0.0402196	0.0299902	0.0227878	0.0380724
CAN	Canada	1990	5746364	0.019737	0.0089934	0.0380593	0.0200882	0.009149	0.0386618
USA	United States of America	1990	50800000	0.0194895	0.0149633	0.0244868	0.0198121	0.0152142	0.0248904
CAN	Canada	2010	5764270	0.0193024	0.0084842	0.0379892	0.0195677	0.0086002	0.0385026
USA	United States of America	2010	51400000	0.0195691	0.0139673	0.0269914	0.0197385	0.0140706	0.0272236
FJI	Fiji	1990	133544	0.0333365	0.0231852	0.0470402	0.0326714	0.0227001	0.046137
FSM	Micronesia (Federated States of)	1990	15167	0.0287453	0.0127621	0.0547324	0.0276858	0.0122703	0.0528174
KIR	Kiribati	1990	13990	0.0284209	0.0125405	0.0574298	0.0278152	0.0122833	0.0561649
MHL	Marshall Islands	1990	9210	0.0285262	0.0125823	0.0554179	0.027918	0.0122839	0.0542682
PNG	Papua New Guinea	1990	676209	0.0314275	0.0136347	0.060849	0.0304515	0.0131904	0.0589524
SLB	Solomon Islands	1990	46353	0.0308019	0.0134703	0.0602202	0.0297652	0.0130259	0.0582923
TON	Tonga	1990	15617	0.0281362	0.0121883	0.0568007	0.0263878	0.0114077	0.0531085
VUT	Vanuatu	1990	24274	0.0297872	0.0129973	0.0600777	0.0290567	0.0126421	0.0585864
WSM	Samoa	1990	23710	0.0274516	0.0120467	0.0534245	0.0264331	0.0115832	0.0515352
FJI	Fiji	2010	159746	0.0345087	0.0216649	0.0521876	0.0341391	0.0214302	0.0516755
FSM	Micronesia (Federated States of)	2010	18514	0.0300335	0.0126912	0.0595365	0.0285616	0.0120439	0.0567096
KIR	Kiribati	2010	19704	0.0280705	0.0121521	0.0572204	0.0284943	0.0123455	0.0580606
MHL	Marshall Islands	2010	10696	0.0288341	0.0121986	0.0589818	0.0292684	0.0123811	0.0598028
PNG	Papua New Guinea	2010	1209857	0.0321059	0.0132563	0.0650575	0.0316199	0.0130614	0.0642009
SLB	Solomon Islands	2010	92254	0.0314135	0.0132573	0.0632272	0.0307328	0.0129339	0.0618022
TON	Tonga	2010	17549	0.0277944	0.0116485	0.057338	0.0275201	0.011533	0.0567913
VUT	Vanuatu	2010	41925	0.0308688	0.0127852	0.0627834	0.0300884	0.0124299	0.0613221
WSM	Samoa	2010	28213	0.0276521	0.0118446	0.0550176	0.0274338	0.0117579	0.0546548
AGO	Angola	1990	1590953	0.0386674	0.0194039	0.0691587	0.037277	0.0187008	0.0668284
CAF	Central African Republic	1990	460894	0.0552677	0.0403609	0.0734602	0.0536524	0.0391711	0.0713831
COD	Democratic Republic of the Congo	1990	5506181	0.0288713	0.0218972	0.0367958	0.0279265	0.0211654	0.0356281
COG	Congo	1990	371397	0.0322903	0.0224018	0.0450344	0.0311059	0.0216002	0.043311
GAB	Gabon	1990	150056	0.040052	0.028024	0.0558003	0.0391271	0.0273735	0.0545431
GNQ	Equatorial Guinea	1990	68867	0.0372912	0.0194255	0.0650103	0.0356765	0.0185772	0.0622241
AGO	Angola	2010	2986395	0.0275972	0.0136249	0.0496589	0.0264922	0.0130583	0.0479277
CAF	Central African Republic	2010	748588	0.0403002	0.028756	0.054123	0.038599	0.0275653	0.0517907
COD	Democratic Republic of the Congo	2010	10200000	0.0206212	0.0158666	0.0261921	0.0197442	0.0151885	0.025046
COG	Congo	2010	700868	0.0223379	0.0152398	0.0308476	0.0217467	0.0148089	0.0300132
GAB	Gabon	2010	270331	0.0281991	0.0199855	0.0389893	0.0273879	0.0193904	0.0379252
GNQ	Equatorial Guinea	2010	111291	0.0259752	0.0137734	0.0450122	0.0251467	0.0132798	0.0436324
BDI	Burundi	1990	954963	0.0192504	0.0128876	0.0273613	0.0186859	0.0125489	0.0265832
COM	Comoros	1990	66803	0.0330242	0.0224327	0.0472021	0.0317565	0.0215456	0.0453154
DJI	Djibouti	1990	91625	0.0336388	0.0226256	0.0473199	0.0324517	0.0218279	0.0457657
ERI	Eritrea	1990	476501	0.0257535	0.014738	0.0429101	0.0250914	0.0143373	0.0418742
ETH	Ethiopia	1990	7625655	0.0261551	0.0204988	0.0326705	0.0252792	0.0198458	0.0316031
KEN	Kenya	1990	3500869	0.014663	0.0120647	0.0175199	0.0140194	0.0115166	0.0167351
MDG	Madagascar	1990	1771809	0.0350228	0.0287609	0.0419282	0.0337186	0.0276313	0.0404651
MOZ	Mozambique	1990	2081245	0.0372497	0.0286877	0.0473883	0.0359647	0.0276662	0.0457338
MUS	Mauritius	1990	218736	0.0239002	0.0121748	0.0412122	0.0231443	0.0117816	0.0399268
MWI	Malawi	1990	1558417	0.0198807	0.0155098	0.0247762	0.0193408	0.0150868	0.0240984
RWA	Rwanda	1990	1071891	0.0158283	0.0124963	0.0197058	0.0152736	0.0120613	0.0190214
SDN	Sudan	1990	4188173	0.0276698	0.0225063	0.0337764	0.0267938	0.0218272	0.0327037
SOM	Somalia	1990	1070210	0.0265501	0.0149194	0.0440017	0.0256261	0.0143967	0.0425308
SYC	Seychelles	1990	12587	0.0231854	0.0119129	0.0410281	0.0223017	0.0114332	0.0394961
TZA	United Republic of Tanzania	1990	3979123	0.0246836	0.0202666	0.0296828	0.0238106	0.0196118	0.0286477
UGA	Uganda	1990	2648999	0.0253675	0.0204964	0.0307377	0.0243772	0.0197016	0.0295459
ZMB	Zambia	1990	1215486	0.0221634	0.0182701	0.0271455	0.0212892	0.0175566	0.0260534
BDI	Burundi	2010	1558104	0.0140896	0.0090727	0.020578	0.0134125	0.008645	0.0195552
COM	Comoros	2010	126718	0.0228066	0.0154333	0.0331027	0.02227	0.0150649	0.0322649
DJI	Djibouti	2010	164530	0.0237286	0.0159751	0.0331877	0.0229727	0.0154768	0.0321088
ERI	Eritrea	2010	988106	0.0181752	0.0101358	0.0306239	0.0176773	0.0098904	0.0298051
ETH	Ethiopia	2010	13700000	0.0189083	0.0152413	0.023305	0.0181682	0.0146663	0.0223733
KEN	Kenya	2010	7020201	0.010065	0.0080319	0.0123678	0.0096053	0.0076772	0.0117957
MDG	Madagascar	2010	3366481	0.0246963	0.020011	0.029733	0.0239707	0.0194328	0.0288783
MOZ	Mozambique	2010	3886343	0.0267527	0.0204471	0.0345327	0.0259374	0.0198329	0.0334971
MUS	Mauritius	2010	254574	0.0156617	0.0080276	0.0273426	0.0158525	0.0081211	0.0276884
MWI	Malawi	2010	2263163	0.0141911	0.0110704	0.0176434	0.0135311	0.0105763	0.0167854
RWA	Rwanda	2010	1911103	0.0114036	0.0090241	0.0141928	0.0108539	0.0085768	0.0135045
SDN	Sudan	2010	7418416	0.0191773	0.0150228	0.0242653	0.0186548	0.014609	0.0236218
SOM	Somalia	2010	1504497	0.0190752	0.0106165	0.0326131	0.0186067	0.0103585	0.0319136
SYC	Seychelles	2010	16508	0.0153702	0.0077615	0.0273614	0.0155591	0.0078565	0.0276781
TZA	United Republic of Tanzania	2010	7153772	0.0175744	0.0144225	0.0210375	0.0168483	0.0138413	0.0201497
UGA	Uganda	2010	5040070	0.0180624	0.014443	0.0220769	0.0171832	0.0137056	0.0210118
ZMB	Zambia	2010	2032612	0.0158268	0.0128686	0.0192372	0.0151005	0.0122829	0.0183259
BWA	Botswana	1990	225513	0.026976	0.0139184	0.0470561	0.0261245	0.0134278	0.0455796
LSO	Lesotho	1990	268735	0.0284062	0.0222398	0.0351844	0.0275114	0.0215449	0.0340417
NAM	Namibia	1990	234792	0.025863	0.0197084	0.0335575	0.0248579	0.0189262	0.032189
SWZ	Swaziland	1990	144472	0.0266134	0.0170258	0.0394613	0.0255773	0.0163512	0.0378447
ZAF	South Africa	1990	6505154	0.0318331	0.0224645	0.0428246	0.0309702	0.0217919	0.0416544
ZWE	Zimbabwe	1990	1635063	0.016361	0.0132352	0.0201072	0.0156767	0.0126545	0.0192486
BWA	Botswana	2010	379070	0.0189499	0.0096469	0.0332566	0.0180849	0.0092033	0.0317481
LSO	Lesotho	2010	387135	0.020387	0.0159117	0.0256305	0.0192124	0.0150033	0.0241609
NAM	Namibia	2010	413067	0.0178488	0.0136792	0.0231363	0.0172926	0.0132572	0.0224151
SWZ	Swaziland	2010	210251	0.0186992	0.0117137	0.0274263	0.017493	0.0109349	0.0256935
ZAF	South Africa	2010	9657157	0.0221772	0.0154932	0.0303196	0.0216023	0.0151049	0.0294772
ZWE	Zimbabwe	2010	2183203	0.0117082	0.0094319	0.0144707	0.0108226	0.0086752	0.0133849
BEN	Benin	1990	743994	0.0185907	0.0152232	0.0226997	0.0179249	0.0146757	0.021901
BFA	Burkina Faso	1990	1431696	0.0222963	0.0180199	0.0276364	0.0213967	0.0172835	0.0265104
CIV	Côte d'Ivoire	1990	1820106	0.0247372	0.0192327	0.0306944	0.0239642	0.018649	0.0297873
CMR	Cameroon	1990	1848473	0.047867	0.0398282	0.0564135	0.0462775	0.0385568	0.0546181
CPV	Cape Verde	1990	54483	0.0279115	0.0153577	0.0465908	0.0265481	0.014617	0.0443494
GHA	Ghana	1990	2305740	0.0236671	0.0196192	0.0283883	0.0227431	0.0188831	0.0272483
GIN	Guinea	1990	882875	0.0299081	0.0232134	0.0376563	0.0290366	0.0224971	0.0365372
GMB	Gambia	1990	161848	0.0287409	0.01573	0.0491883	0.0272643	0.0148813	0.0466908
GNB	Guinea-Bissau	1990	152904	0.0279063	0.0158774	0.046271	0.0278776	0.0158606	0.0462568
LBR	Liberia	1990	330267	0.0304958	0.0236879	0.0390693	0.0293804	0.0228384	0.0376222
MLI	Mali	1990	1282209	0.0323349	0.0268232	0.0384078	0.0310839	0.0257682	0.0369752
MRT	Mauritania	1990	315218	0.0291709	0.0223639	0.0371974	0.028089	0.0215524	0.035804
NER	Niger	1990	1213801	0.0310269	0.0251194	0.0379055	0.0298633	0.0241369	0.0365005
NGA	Nigeria	1990	14900000	0.0322058	0.0264288	0.0386944	0.0312618	0.0256794	0.037523
SEN	Senegal	1990	1062110	0.0294162	0.0246649	0.0346923	0.0280781	0.0235233	0.0331048
SLE	Sierra Leone	1990	683798	0.0324707	0.0230695	0.0443686	0.031585	0.0224252	0.0431518
STP	São Tomé and Príncipe	1990	17095	0.020037	0.0126373	0.029651	0.0192312	0.0121008	0.0284887
TCD	Chad	1990	910851	0.0230549	0.017454	0.0301449	0.0223563	0.0169248	0.0292429
TGO	Togo	1990	559269	0.0208774	0.0155827	0.0265747	0.0200848	0.015003	0.0255806
BEN	Benin	2010	1459822	0.0132395	0.0106644	0.0162544	0.012798	0.0102831	0.0157318
BFA	Burkina Faso	2010	2714538	0.0160768	0.0128083	0.0200117	0.0155193	0.0123569	0.019318
CIV	Côte d'Ivoire	2010	3193600	0.0179145	0.0138364	0.0227959	0.0171706	0.0132026	0.0218867
CMR	Cameroon	2010	3352112	0.0338884	0.0277619	0.0410813	0.0326	0.0266949	0.0394503
CPV	Cape Verde	2010	90338	0.019255	0.0105305	0.0323694	0.0184705	0.0101336	0.0310691
GHA	Ghana	2010	4240320	0.0165192	0.0134315	0.0200839	0.016069	0.0130778	0.0194802
GIN	Guinea	2010	1596166	0.0218623	0.0169152	0.0279628	0.0210726	0.0163024	0.0270016
GMB	Gambia	2010	307529	0.0201632	0.010944	0.0349216	0.0194645	0.0105655	0.0336734
GNB	Guinea-Bissau	2010	253416	0.0208135	0.0114826	0.0352279	0.0201069	0.0110653	0.0340286
LBR	Liberia	2010	661929	0.0217223	0.016323	0.0279813	0.0209909	0.0157785	0.0270126
MLI	Mali	2010	2445561	0.0234585	0.0192229	0.0282135	0.0226233	0.0185388	0.0272684
MRT	Mauritania	2010	610037	0.0204828	0.0153385	0.0264507	0.0199732	0.014931	0.025763
NER	Niger	2010	2305348	0.0225484	0.0181737	0.0276834	0.021758	0.0175313	0.0267592
NGA	Nigeria	2010	25700000	0.0226092	0.0185482	0.0270949	0.0218142	0.017855	0.0260923
SEN	Senegal	2010	2138446	0.0209589	0.0172439	0.0251394	0.020236	0.0166587	0.0242601
SLE	Sierra Leone	2010	1023807	0.0234103	0.0166588	0.0319702	0.0227971	0.0161718	0.0311682
STP	São Tomé and Príncipe	2010	28790	0.0140406	0.0087666	0.0210466	0.0134732	0.008411	0.0201769
TCD	Chad	2010	1756459	0.0168678	0.0127175	0.0216749	0.0161936	0.0122167	0.0208137
TGO	Togo	2010	1070193	0.0146765	0.0109416	0.0190841	0.0141701	0.010569	0.0184184

## Sheet: Secondary - child-seeking
Prevalence of secondary infertility among women exposed to the risk of pregnancy, with a prior live birth
County		Year	Total population, women aged 20-44 years	Prevalence of secondary infertility			Age-standardized prevalence of secondary infertility
ISO3 code	Country name			Estimate	Lower 95% uncertainty interval	Upper 95% uncertainty interval	Estimate	Lower 95% uncertainty interval	Upper 95% uncertainty interval
BRN	Brunei Darussalam	1990	48806	0.0647392	0.0279101	0.117216	0.070833	0.0309214	0.127212
JPN	Japan	1990	21800000	0.080486	0.0365514	0.150527	0.0693646	0.0312282	0.13103
KOR	Republic of Korea	1990	9041102	0.0548792	0.0333971	0.0823282	0.0612951	0.037473	0.091626
SGP	Singapore	1990	746131	0.0652175	0.0283326	0.12049	0.0694641	0.030357	0.127685
BRN	Brunei Darussalam	2010	91314	0.0743103	0.028701	0.143238	0.0740971	0.0287744	0.142232
JPN	Japan	2010	20100000	0.0836279	0.0337886	0.167925	0.0733098	0.0293939	0.148345
KOR	Republic of Korea	2010	9085255	0.0742368	0.0381204	0.124739	0.0644303	0.0329264	0.108908
SGP	Singapore	2010	946395	0.0855348	0.0326237	0.171178	0.0728502	0.0274718	0.14759
ARM	Armenia	1990	705400	0.152063	0.108054	0.203768	0.16661	0.119609	0.221073
AZE	Azerbaijan	1990	1370871	0.125892	0.0814814	0.180367	0.15474	0.1023	0.21767
GEO	Georgia	1990	1017993	0.137823	0.0700553	0.231233	0.141929	0.0726325	0.236723
KAZ	Kazakhstan	1990	3129493	0.126721	0.0931072	0.16223	0.134972	0.0996235	0.171997
KGZ	Kyrgyzstan	1990	761589	0.120624	0.0842239	0.166621	0.138977	0.0980337	0.189809
MNG	Mongolia	1990	367975	0.116172	0.0610691	0.190312	0.143915	0.0773274	0.230628
TJK	Tajikistan	1990	861779	0.114216	0.0600893	0.190297	0.143636	0.077849	0.232961
TKM	Turkmenistan	1990	643821	0.117429	0.059091	0.192022	0.142364	0.0732902	0.227389
UZB	Uzbekistan	1990	3505111	0.0835147	0.0554023	0.11907	0.10382	0.0697139	0.145801
ARM	Armenia	2010	597414	0.174264	0.131075	0.224753	0.187714	0.141552	0.24156
AZE	Azerbaijan	2010	1912075	0.168578	0.120171	0.225292	0.173038	0.123178	0.231424
GEO	Georgia	2010	796644	0.162919	0.0853544	0.265378	0.161203	0.0841723	0.263422
KAZ	Kazakhstan	2010	3179008	0.147256	0.107068	0.201882	0.152917	0.111282	0.209298
KGZ	Kyrgyzstan	2010	1044406	0.142985	0.0974288	0.20032	0.157523	0.107851	0.219312
MNG	Mongolia	2010	601551	0.152237	0.082227	0.252183	0.163018	0.0885476	0.268156
TJK	Tajikistan	2010	1261274	0.139898	0.0731786	0.224915	0.161499	0.0854536	0.25636
TKM	Turkmenistan	2010	1016649	0.146983	0.0800308	0.234129	0.160187	0.0878684	0.253126
UZB	Uzbekistan	2010	5446519	0.10728	0.0679594	0.156344	0.118634	0.0754669	0.172108
PRK	Democratic People's Republic of Korea	1990	3819800	0.0888853	0.0419344	0.160482	0.0984963	0.0465743	0.177316
TWN	Taiwan	1990	4137632	0.0882658	0.0422636	0.158101	0.0982744	0.0476471	0.173802
PRK	Democratic People's Republic of Korea	2010	4621049	0.120023	0.0558359	0.208681	0.105201	0.0483855	0.185367
TWN	Taiwan	2010	4526507	0.113806	0.0527482	0.20478	0.104744	0.0483035	0.189905
AFG	Afghanistan	1990	1912520	0.0916536	0.0464067	0.158451	0.105472	0.0538432	0.180346
BGD	Bangladesh	1990	16400000	0.0815635	0.0688954	0.0960219	0.101508	0.085958	0.119026
BTN	Bhutan	1990	83780	0.0954393	0.0465481	0.164508	0.104523	0.051256	0.179246
IND	India	1990	147000000	0.10634	0.0871497	0.129049	0.119126	0.0979138	0.144127
NPL	Nepal	1990	3017931	0.0711236	0.0580754	0.0846482	0.0813912	0.0665891	0.0966645
PAK	Pakistan	1990	17000000	0.0863246	0.0701538	0.104625	0.100756	0.0821095	0.121746
AFG	Afghanistan	2010	4667212	0.0968517	0.0488706	0.164963	0.114741	0.0587721	0.19306
BGD	Bangladesh	2010	29700000	0.100065	0.0822316	0.119353	0.108144	0.088994	0.128688
BTN	Bhutan	2010	135335	0.0958201	0.0484068	0.166122	0.111386	0.0568804	0.190693
IND	India	2010	226000000	0.119027	0.0952667	0.145833	0.126151	0.10117	0.154393
NPL	Nepal	2010	5504228	0.079333	0.0661881	0.094545	0.087109	0.0727338	0.103574
PAK	Pakistan	2010	31400000	0.0930786	0.0724845	0.117981	0.107298	0.0839242	0.135547
IDN	Indonesia	1990	32800000	0.107614	0.0935023	0.122824	0.126528	0.110305	0.144077
KHM	Cambodia	1990	1726783	0.0926383	0.0719507	0.117518	0.10475	0.0817238	0.132225
LAO	Lao People's Democratic Republic	1990	653839	0.0855426	0.0451495	0.145539	0.101407	0.0540935	0.170162
LKA	Sri Lanka	1990	3287496	0.0760816	0.0525228	0.106527	0.0828253	0.0572773	0.115676
MDV	Maldives	1990	30633	0.111529	0.0789192	0.152456	0.146932	0.105658	0.197099
MMR	Myanmar	1990	7158896	0.0852645	0.0456497	0.14126	0.0987226	0.0534555	0.161743
MYS	Malaysia	1990	3394366	0.0865317	0.0611348	0.117775	0.097442	0.0692065	0.13176
PHL	Philippines	1990	10600000	0.0768548	0.0638708	0.0910977	0.0905247	0.0754266	0.106908
THA	Thailand	1990	11500000	0.0840904	0.0587483	0.116072	0.0932079	0.0655062	0.128169
TLS	Timor-Leste	1990	134719	0.0590452	0.0395254	0.0854308	0.0692185	0.0465801	0.0995994
VNM	Viet Nam	1990	12200000	0.0443349	0.0309504	0.0603567	0.0548431	0.0384558	0.0742429
IDN	Indonesia	2010	49600000	0.133523	0.11103	0.158644	0.134791	0.112163	0.160067
KHM	Cambodia	2010	2700144	0.101103	0.0816783	0.122545	0.112829	0.0912796	0.136603
LAO	Lao People's Democratic Republic	2010	1153956	0.0957743	0.0497619	0.161102	0.109538	0.0573768	0.183033
LKA	Sri Lanka	2010	3975404	0.0907782	0.0607032	0.131776	0.0892947	0.0596768	0.129726
MDV	Maldives	2010	69409	0.136848	0.100144	0.180129	0.158251	0.116611	0.207207
MMR	Myanmar	2010	10100000	0.104841	0.0577763	0.173744	0.10619	0.0586163	0.175726
MYS	Malaysia	2010	5282778	0.100591	0.0654234	0.143293	0.103744	0.0675471	0.147642
PHL	Philippines	2010	16900000	0.0897342	0.0727159	0.109058	0.0983171	0.079775	0.11918
THA	Thailand	2010	13700000	0.110742	0.0745141	0.157915	0.100695	0.0675146	0.144218
TLS	Timor-Leste	2010	154657	0.0627112	0.0438244	0.0862037	0.0743227	0.0521503	0.101857
VNM	Viet Nam	2010	18500000	0.0577903	0.0409362	0.0794376	0.0598531	0.0424152	0.0822469
AUS	Australia	1990	3350690	0.079614	0.0303196	0.158558	0.0772558	0.0293811	0.154154
NZL	New Zealand	1990	661955	0.0785829	0.0299294	0.165569	0.0778634	0.0296362	0.164169
AUS	Australia	2010	3935996	0.0863026	0.0319307	0.174802	0.0814223	0.0299693	0.165658
NZL	New Zealand	2010	759593	0.0890871	0.0321939	0.184113	0.0812098	0.0291732	0.169275
ATG	Antigua and Barbuda	1990	11863	0.0829648	0.0408391	0.142873	0.0971957	0.0484941	0.165336
BHS	Bahamas	1990	51215	0.0878848	0.0449237	0.14844	0.0991546	0.0511543	0.166056
BLZ	Belize	1990	30861	0.0648736	0.0435903	0.0912613	0.0859939	0.0583417	0.119748
BRB	Barbados	1990	54938	0.0940472	0.0476966	0.15981	0.102414	0.0523813	0.172355
CUB	Cuba	1990	2138337	0.0860952	0.0445077	0.143451	0.0983328	0.051175	0.162425
DMA	Dominica	1990	13528	0.0862155	0.0444737	0.14677	0.100923	0.0527536	0.169589
DOM	Dominican Republic	1990	1268920	0.0916132	0.07679	0.107533	0.110387	0.0928088	0.129036
GRD	Grenada	1990	14536	0.0872376	0.046063	0.149405	0.101134	0.0540875	0.1711
GUY	Guyana	1990	141994	0.0805589	0.0549767	0.111985	0.0961864	0.0662225	0.132771
HTI	Haiti	1990	1165516	0.0971966	0.0798431	0.117388	0.112691	0.0927297	0.135524
JAM	Jamaica	1990	423054	0.0884617	0.060198	0.121219	0.107956	0.0739897	0.14673
LCA	Saint Lucia	1990	23550	0.0846768	0.0444297	0.141896	0.101435	0.0537286	0.16782
PRI	Puerto Rico	1990	670622	0.098724	0.0498597	0.165504	0.0979962	0.0494544	0.164426
SUR	Suriname	1990	74816	0.0852684	0.0423914	0.142113	0.101815	0.0512458	0.167777
TTO	Trinidad and Tobago	1990	234127	0.111635	0.0844591	0.145257	0.125164	0.0951783	0.161946
VCT	Saint Vincent and the Grenadines	1990	18040	0.0803125	0.0398401	0.138088	0.100807	0.0508521	0.170286
ATG	Antigua and Barbuda	2010	17722	0.113354	0.0556426	0.191701	0.101903	0.0495765	0.174194
BHS	Bahamas	2010	68519	0.106392	0.0555817	0.177415	0.103581	0.0539894	0.173227
BLZ	Belize	2010	57898	0.0811289	0.0537745	0.116126	0.0900456	0.0597738	0.1283
BRB	Barbados	2010	48581	0.116239	0.0593555	0.192915	0.106029	0.0537313	0.177223
CUB	Cuba	2010	2097016	0.121935	0.064915	0.200195	0.102393	0.0538479	0.170256
DMA	Dominica	2010	13536	0.116164	0.0614544	0.196635	0.104464	0.054721	0.178674
DOM	Dominican Republic	2010	1839056	0.10825	0.0870124	0.130524	0.113816	0.0916177	0.137014
GRD	Grenada	2010	19806	0.0844638	0.0441724	0.146831	0.104661	0.0552905	0.179164
GUY	Guyana	2010	137436	0.099439	0.0639297	0.140932	0.0993294	0.0638936	0.140733
HTI	Haiti	2010	1830740	0.0982741	0.0780164	0.121266	0.11658	0.0927839	0.143131
JAM	Jamaica	2010	504850	0.117591	0.0779736	0.164706	0.112991	0.0746665	0.158859
LCA	Saint Lucia	2010	36090	0.10107	0.0522054	0.168499	0.105891	0.0548529	0.176018
PRI	Puerto Rico	2010	677170	0.107241	0.0542508	0.180347	0.102043	0.0514355	0.17231
SUR	Suriname	2010	98754	0.105726	0.0526838	0.17624	0.106323	0.0529371	0.177363
TTO	Trinidad and Tobago	2010	287698	0.12479	0.0905104	0.163391	0.130376	0.0946661	0.170516
VCT	Saint Vincent and the Grenadines	2010	20474	0.0995001	0.0495375	0.167449	0.104344	0.0520768	0.175082
ALB	Albania	1990	599992	0.0703845	0.0452469	0.101026	0.0836603	0.0541135	0.11908
BGR	Bulgaria	1990	1520669	0.153697	0.0799549	0.257182	0.140017	0.0721943	0.236758
BIH	Bosnia and Herzegovina	1990	855854	0.140467	0.071737	0.232565	0.145775	0.0749783	0.239865
CZE	Czech Republic	1990	1831850	0.209894	0.147781	0.28466	0.186836	0.130372	0.255785
HRV	Croatia	1990	815400	0.153671	0.0810233	0.255326	0.144061	0.0757357	0.240297
HUN	Hungary	1990	1812097	0.154506	0.0829201	0.254733	0.139675	0.074379	0.232043
MKD	Macedonia (Former Yugoslav Republic of)	1990	363000	0.142504	0.0771163	0.234268	0.143229	0.0777384	0.235055
MNE	Montenegro	1990	111382	0.143434	0.0766057	0.230412	0.141664	0.0756262	0.227674
POL	Poland	1990	7099019	0.165057	0.117644	0.219682	0.1533	0.109032	0.204504
ROU	Romania	1990	4059711	0.143239	0.0769925	0.233011	0.140804	0.0756822	0.229276
SRB	Serbia	1990	1701112	0.152153	0.0831138	0.247209	0.143958	0.0784889	0.234617
SVK	Slovakia	1990	970225	0.143712	0.0734008	0.233811	0.13997	0.0716023	0.227519
SVN	Slovenia	1990	362168	0.142249	0.0983014	0.199458	0.136786	0.0944121	0.192069
ALB	Albania	2010	613960	0.0913655	0.0646103	0.123123	0.0952301	0.0673351	0.128343
BGR	Bulgaria	2010	1312499	0.169151	0.0844392	0.283117	0.15862	0.0787294	0.267289
BIH	Bosnia and Herzegovina	2010	720627	0.174135	0.0887059	0.278915	0.162379	0.0819016	0.262556
CZE	Czech Republic	2010	1921236	0.22055	0.148948	0.310111	0.210851	0.142178	0.297186
HRV	Croatia	2010	739244	0.172665	0.0924105	0.283391	0.161069	0.0855585	0.266358
HUN	Hungary	2010	1790311	0.169047	0.0868825	0.28005	0.158512	0.0811985	0.263414
MKD	Macedonia (Former Yugoslav Republic of)	2010	382723	0.166003	0.0899737	0.271247	0.160845	0.0868179	0.263735
MNE	Montenegro	2010	114758	0.161559	0.0847501	0.264599	0.159816	0.0837377	0.262042
POL	Poland	2010	7055315	0.169891	0.110106	0.245652	0.175087	0.113881	0.252078
ROU	Romania	2010	4208905	0.170822	0.0894481	0.279873	0.159132	0.0826487	0.263071
SRB	Serbia	2010	1744876	0.167907	0.0894074	0.274911	0.162107	0.0860474	0.266349
SVK	Slovakia	2010	1057224	0.158043	0.0823341	0.257714	0.157431	0.0822054	0.25627
SVN	Slovenia	2010	353876	0.167988	0.108358	0.240383	0.15457	0.0991849	0.222507
BLR	Belarus	1990	1877708	0.173545	0.0932071	0.291143	0.172495	0.0930143	0.288202
EST	Estonia	1990	280205	0.186014	0.0994377	0.294171	0.175858	0.093708	0.279214
LTU	Lithuania	1990	673391	0.188365	0.132349	0.247596	0.18851	0.132609	0.247559
LVA	Latvia	1990	468815	0.172459	0.0911905	0.272131	0.170525	0.0902883	0.268879
MDA	Moldova	1990	822914	0.190726	0.140011	0.246	0.188589	0.138714	0.242435
RUS	Russian Federation	1990	27800000	0.181982	0.0922944	0.298928	0.174158	0.088378	0.286338
UKR	Ukraine	1990	9123935	0.201713	0.14631	0.266408	0.193809	0.140463	0.256207
BLR	Belarus	2010	1832751	0.197633	0.109455	0.313598	0.194245	0.1073	0.3092
EST	Estonia	2010	240767	0.202525	0.110315	0.324743	0.19824	0.107475	0.319243
LTU	Lithuania	2010	601830	0.222121	0.152174	0.298317	0.212492	0.144293	0.287141
LVA	Latvia	2010	411264	0.196087	0.105793	0.311394	0.192507	0.103431	0.30691
MDA	Moldova	2010	676652	0.199754	0.15127	0.256636	0.211513	0.160514	0.270958
RUS	Russian Federation	2010	27700000	0.191949	0.103152	0.314946	0.195165	0.105167	0.319347
UKR	Ukraine	2010	8505447	0.221191	0.171341	0.278778	0.217391	0.168234	0.27428
AND	Andorra	1990	9450	0.0807475	0.0395866	0.136441	0.0821842	0.0403032	0.138799
AUT	Austria	1990	1445226	0.0812146	0.0420826	0.145338	0.0828915	0.0429791	0.148172
BEL	Belgium	1990	1837513	0.114985	0.0797801	0.157912	0.110985	0.0769071	0.152609
CHE	Switzerland	1990	1279589	0.0856763	0.043797	0.143933	0.0814266	0.0415082	0.137334
CYP	Cyprus	1990	142854	0.0802926	0.0410194	0.136146	0.0814866	0.0416625	0.138052
DEU	Germany	1990	14500000	0.0733664	0.0420035	0.119442	0.0765532	0.0439379	0.124259
DNK	Denmark	1990	949780	0.078273	0.0432096	0.127146	0.0724941	0.0399102	0.118308
ESP	Spain	1990	6963284	0.0832681	0.0560713	0.113912	0.0847554	0.0570825	0.115967
FIN	Finland	1990	956735	0.0747153	0.0510274	0.105871	0.0659173	0.0448157	0.0936292
FRA	France	1990	10600000	0.0889989	0.0448294	0.153675	0.0840729	0.0422058	0.145679
GBR	United Kingdom	1990	10600000	0.0840402	0.0428009	0.14794	0.0814897	0.0413536	0.143954
GRC	Greece	1990	1780389	0.0847669	0.0436782	0.146686	0.0826642	0.0425114	0.14333
IRL	Ireland	1990	613993	0.0825724	0.042311	0.142664	0.0815932	0.0417849	0.141074
ISL	Iceland	1990	48394	0.0795778	0.0405269	0.136983	0.0818545	0.0417948	0.140502
ISR	Israel	1990	790841	0.0817093	0.0406085	0.141692	0.0813867	0.0404819	0.141103
ITA	Italy	1990	10400000	0.0945871	0.0672721	0.131213	0.0925969	0.0657934	0.12868
LUX	Luxembourg	1990	74231	0.085378	0.0420081	0.145532	0.0833475	0.0410057	0.14212
MLT	Malta	1990	72947	0.0922213	0.0466606	0.155283	0.082183	0.0413841	0.139304
NLD	Netherlands	1990	2977799	0.0862757	0.0438456	0.150942	0.0832302	0.0421503	0.146056
NOR	Norway	1990	778370	0.0846559	0.041163	0.142001	0.0807916	0.0391343	0.135954
PRT	Portugal	1990	1764646	0.0905181	0.0614781	0.129119	0.0887742	0.0602239	0.126743
SWE	Sweden	1990	1482688	0.088525	0.0445494	0.156529	0.0803767	0.0401841	0.143388
AND	Andorra	2010	15754	0.097476	0.0436965	0.170453	0.0857293	0.0381698	0.15103
AUT	Austria	2010	1441953	0.101105	0.050313	0.183264	0.0869094	0.0427333	0.15948
BEL	Belgium	2010	1745875	0.130309	0.0822236	0.194683	0.115956	0.0726301	0.174469
CHE	Switzerland	2010	1329228	0.101767	0.0495697	0.180104	0.0862272	0.0415329	0.154595
CYP	Cyprus	2010	208435	0.0843769	0.039674	0.148719	0.0848029	0.0398811	0.14945
DEU	Germany	2010	13200000	0.0944943	0.052004	0.16157	0.0800993	0.0437855	0.138591
DNK	Denmark	2010	886726	0.0885501	0.0449831	0.151487	0.0766932	0.0386309	0.132127
ESP	Spain	2010	8553943	0.0992107	0.0618147	0.1459	0.0872167	0.0541658	0.128796
FIN	Finland	2010	817073	0.0753215	0.046016	0.1178	0.0693153	0.0422242	0.108842
FRA	France	2010	10200000	0.0966619	0.0454449	0.173822	0.0877439	0.0409402	0.158997
GBR	United Kingdom	2010	10500000	0.0953192	0.0446631	0.172411	0.085647	0.0398622	0.1562
GRC	Greece	2010	1991775	0.0982058	0.0477893	0.177695	0.0858104	0.0414951	0.156419
IRL	Ireland	2010	842869	0.0897362	0.043313	0.159763	0.0852734	0.0411107	0.152029
ISL	Iceland	2010	55438	0.0884251	0.0412217	0.162008	0.0854738	0.0396978	0.15714
ISR	Israel	2010	1289316	0.0840752	0.039834	0.151929	0.0853646	0.0405458	0.153943
ITA	Italy	2010	10100000	0.116098	0.0768931	0.16639	0.0964946	0.0634503	0.139414
LUX	Luxembourg	2010	92117	0.100808	0.047472	0.180218	0.0873584	0.0408347	0.157583
MLT	Malta	2010	71143	0.0846915	0.0403131	0.152151	0.0858372	0.0409172	0.154048
NLD	Netherlands	2010	2701428	0.101587	0.0474592	0.18481	0.08693	0.04018	0.160158
NOR	Norway	2010	809932	0.0954333	0.0435523	0.170136	0.0842689	0.0381507	0.151556
PRT	Portugal	2010	1886590	0.103263	0.0590854	0.166691	0.0919742	0.0523741	0.149168
SWE	Sweden	2010	1503332	0.0935006	0.0444829	0.170826	0.0845062	0.0399365	0.155619
BOL	Bolivia	1990	1107977	0.0498407	0.0408264	0.0610396	0.0566966	0.0465027	0.0692963
ECU	Ecuador	1990	1774552	0.0559253	0.0452124	0.0685002	0.0655139	0.053115	0.0800976
PER	Peru	1990	3770586	0.0405284	0.0334583	0.0492997	0.0472785	0.0391004	0.0573888
BOL	Bolivia	2010	1752051	0.053433	0.0430201	0.0652062	0.0587123	0.0473246	0.0715781
ECU	Ecuador	2010	2747366	0.0642763	0.0499824	0.0803994	0.0683626	0.0532636	0.0854029
PER	Peru	2010	5543150	0.0464753	0.0363158	0.0589949	0.0491786	0.038489	0.0623719
COL	Colombia	1990	6382337	0.0607816	0.0512994	0.0716759	0.0705198	0.0596484	0.0829605
CRI	Costa Rica	1990	576743	0.0722635	0.0509773	0.101195	0.0842744	0.0598244	0.117483
GTM	Guatemala	1990	1334398	0.0782711	0.0591991	0.0994194	0.0895345	0.0679968	0.113673
HND	Honduras	1990	771005	0.0638183	0.0504814	0.0796869	0.079007	0.0626892	0.0983271
MEX	Mexico	1990	14600000	0.0547568	0.0406699	0.0714446	0.0662481	0.0494571	0.0859783
NIC	Nicaragua	1990	638056	0.0597342	0.0456443	0.077005	0.0757566	0.0582567	0.0970529
PAN	Panama	1990	439797	0.0775138	0.0539845	0.10848	0.089714	0.0627522	0.124844
SLV	El Salvador	1990	878811	0.0603744	0.0480831	0.073769	0.0716292	0.0571753	0.087243
VEN	Venezuela (Bolivarian Republic of)	1990	3588059	0.0670429	0.0465668	0.0929353	0.0757415	0.052827	0.104646
COL	Colombia	2010	9018195	0.0738973	0.0616321	0.0887583	0.0741041	0.0617873	0.0890064
CRI	Costa Rica	2010	913606	0.0848842	0.0581845	0.122149	0.0880402	0.0603926	0.126682
GTM	Guatemala	2010	2489109	0.0805005	0.0580601	0.106105	0.0936811	0.0679321	0.122805
HND	Honduras	2010	1388245	0.0711607	0.0563085	0.0888532	0.0821194	0.0651813	0.102178
MEX	Mexico	2010	22200000	0.067905	0.0478472	0.0928941	0.0688151	0.0485222	0.0940729
NIC	Nicaragua	2010	1100139	0.0687519	0.0523026	0.0903856	0.079223	0.0605015	0.103806
PAN	Panama	2010	664841	0.0946474	0.0628286	0.134656	0.0938457	0.0622649	0.133585
SLV	El Salvador	2010	1194261	0.0685399	0.0543095	0.0847004	0.0744966	0.0591196	0.0919893
VEN	Venezuela (Bolivarian Republic of)	2010	5522082	0.0752667	0.0513568	0.10515	0.0787533	0.0538163	0.109931
ARG	Argentina	1990	5543327	0.0843603	0.0365842	0.168775	0.0848347	0.0368232	0.169598
CHL	Chile	1990	2614130	0.0754792	0.0306828	0.149017	0.0834926	0.0342926	0.163406
URY	Uruguay	1990	528700	0.0841862	0.0340341	0.164655	0.0847545	0.0342789	0.165746
ARG	Argentina	2010	7377629	0.0858433	0.0364882	0.17082	0.0887434	0.03788	0.175901
CHL	Chile	2010	3193049	0.0902577	0.0369206	0.177904	0.0870946	0.0354444	0.172468
URY	Uruguay	2010	577893	0.0907139	0.0376668	0.172626	0.0886313	0.0367553	0.16887
BRA	Brazil	1990	28300000	0.0595961	0.0459737	0.0756753	0.0670069	0.0518835	0.0850113
PRY	Paraguay	1990	703802	0.0790472	0.0595034	0.102371	0.0917104	0.0691273	0.118133
BRA	Brazil	2010	39200000	0.068415	0.0505724	0.088833	0.0694446	0.0513682	0.0901514
PRY	Paraguay	2010	1170324	0.0840062	0.0603213	0.111215	0.0952741	0.0686419	0.125706
ARE	United Arab Emirates	1990	243154	0.059073	0.0298431	0.102487	0.0656709	0.0336119	0.112875
BHR	Bahrain	1990	87717	0.0526412	0.0264621	0.0921509	0.0659039	0.0336957	0.113292
DZA	Algeria	1990	4055537	0.0504689	0.0385083	0.0635615	0.0616036	0.047241	0.0772865
EGY	Egypt	1990	9375821	0.0499906	0.042635	0.0578034	0.054683	0.0466686	0.0631681
IRN	Iran (Islamic Republic of)	1990	8488443	0.0565547	0.0307538	0.0961154	0.0674115	0.0370451	0.113539
IRQ	Iraq	1990	2628040	0.0550025	0.0290958	0.0944953	0.0686353	0.0367217	0.116499
JOR	Jordan	1990	446547	0.0359993	0.028414	0.0449133	0.0457922	0.0362487	0.0571267
KWT	Kuwait	1990	399765	0.059563	0.0308341	0.102324	0.0669112	0.034798	0.114419
LBN	Lebanon	1990	555461	0.0708197	0.0532791	0.0914537	0.0828268	0.0625175	0.106193
LBY	Libyan Arab Jamahiriya	1990	635537	0.0499901	0.0340394	0.0688573	0.0623682	0.0426982	0.0855179
MAR	Morocco	1990	4293180	0.0610928	0.0500574	0.0735784	0.0731227	0.0600678	0.0877812
OMN	Oman	1990	236780	0.0608924	0.0318812	0.106014	0.0686414	0.0361529	0.118753
PSE	Occupied Palestinian Territory	1990	310591	0.0529035	0.0269132	0.0932692	0.0655497	0.0335667	0.114628
QAT	Qatar	1990	63967	0.0650484	0.0330388	0.112225	0.0659263	0.0335772	0.113455
SAU	Saudi Arabia	1990	2294133	0.0533926	0.0269837	0.0951559	0.0687876	0.0353092	0.120642
SYR	Syrian Arab Republic	1990	1857064	0.0487464	0.0383127	0.0607939	0.0626228	0.0496483	0.0778088
TUN	Tunisia	1990	1423484	0.0455347	0.0354714	0.0577707	0.0553607	0.0433233	0.0700944
TUR	Turkey	1990	9804430	0.0666074	0.0551356	0.0797019	0.0759376	0.0630249	0.0907509
YEM	Yemen	1990	1658958	0.0681631	0.0523371	0.0863272	0.0803818	0.0618757	0.101397
ARE	United Arab Emirates	2010	1259902	0.0597333	0.030009	0.104857	0.0701812	0.0356439	0.121751
BHR	Bahrain	2010	232985	0.066159	0.0334422	0.1165	0.0705575	0.0358368	0.123755
DZA	Algeria	2010	7573851	0.0608132	0.0467066	0.076623	0.0665384	0.0512164	0.0836806
EGY	Egypt	2010	15200000	0.0521206	0.0425074	0.0627963	0.0589493	0.0481471	0.0709538
IRN	Iran (Islamic Republic of)	2010	17100000	0.061518	0.0328732	0.10656	0.0722996	0.038885	0.124037
IRQ	Iraq	2010	5295070	0.0673206	0.0355672	0.117398	0.0753754	0.0400255	0.130393
JOR	Jordan	2010	1126787	0.0403857	0.0320471	0.0500741	0.0489775	0.038951	0.0605976
KWT	Kuwait	2010	517244	0.0684411	0.0354202	0.118364	0.0721659	0.0374931	0.12414
LBN	Lebanon	2010	868531	0.0889706	0.066546	0.11608	0.0887997	0.0664247	0.115849
LBY	Libyan Arab Jamahiriya	2010	1369810	0.0619254	0.0416441	0.0878356	0.0671021	0.0453152	0.0947559
MAR	Morocco	2010	6609684	0.0743774	0.0584274	0.0929139	0.0797886	0.0627535	0.0994393
OMN	Oman	2010	502377	0.0589646	0.0311907	0.101617	0.0732803	0.0391494	0.1245
PSE	Occupied Palestinian Territory	2010	658667	0.0609884	0.0302129	0.107794	0.0703394	0.0350487	0.123574
QAT	Qatar	2010	230487	0.0652067	0.0335693	0.111579	0.0708153	0.0367167	0.120387
SAU	Saudi Arabia	2010	5061035	0.0660756	0.0327252	0.116576	0.0733307	0.0365479	0.128299
SYR	Syrian Arab Republic	2010	3613925	0.0614549	0.0466855	0.0790389	0.0673319	0.0511622	0.0864865
TUN	Tunisia	2010	2212832	0.0570557	0.0430103	0.0748454	0.0597969	0.0451136	0.0784312
TUR	Turkey	2010	14700000	0.0798009	0.0626689	0.100155	0.0816306	0.0641686	0.102383
YEM	Yemen	2010	3869641	0.0689106	0.0523255	0.0871043	0.0884907	0.0674533	0.111294
CAN	Canada	1990	5746364	0.0651164	0.0280932	0.120527	0.0635885	0.0274338	0.117788
USA	United States of America	1990	50800000	0.0501089	0.0371493	0.0649366	0.0485799	0.0360117	0.0629235
CAN	Canada	2010	5764270	0.0723395	0.0299974	0.137354	0.0667672	0.0275301	0.127484
USA	United States of America	2010	51400000	0.0549843	0.0388865	0.0759058	0.0516885	0.0364988	0.0714275
FJI	Fiji	1990	133544	0.103287	0.0711512	0.140259	0.117801	0.0817047	0.159291
FSM	Micronesia (Federated States of)	1990	15167	0.0923393	0.0426619	0.16643	0.11134	0.052431	0.196999
KIR	Kiribati	1990	13990	0.0945432	0.0444113	0.171071	0.109301	0.0520822	0.194545
MHL	Marshall Islands	1990	9210	0.095458	0.0459547	0.171708	0.110345	0.0538565	0.19556
PNG	Papua New Guinea	1990	676209	0.102578	0.0459021	0.18864	0.117408	0.0531508	0.213219
SLB	Solomon Islands	1990	46353	0.0984949	0.0447833	0.18169	0.112731	0.0517893	0.205282
TON	Tonga	1990	15617	0.0880064	0.0394187	0.164219	0.107763	0.0487548	0.198253
VUT	Vanuatu	1990	24274	0.0964234	0.0439471	0.172095	0.111558	0.0514265	0.196199
WSM	Samoa	1990	23710	0.0892457	0.0403257	0.163579	0.106785	0.0489862	0.192275
FJI	Fiji	2010	159746	0.120744	0.0785845	0.17163	0.126977	0.082786	0.18002
FSM	Micronesia (Federated States of)	2010	18514	0.0999655	0.0467168	0.183267	0.119106	0.0562295	0.215866
KIR	Kiribati	2010	19704	0.125146	0.0596266	0.224247	0.116504	0.055159	0.21015
MHL	Marshall Islands	2010	10696	0.127921	0.060028	0.232465	0.119119	0.0555624	0.21794
PNG	Papua New Guinea	2010	1209857	0.115658	0.0484956	0.210004	0.126018	0.0534266	0.226136
SLB	Solomon Islands	2010	92254	0.10683	0.0459237	0.192185	0.120628	0.0525528	0.214275
TON	Tonga	2010	17549	0.109442	0.0484301	0.203544	0.115952	0.0516327	0.214099
VUT	Vanuatu	2010	41925	0.108689	0.0491602	0.194958	0.119554	0.0544521	0.212844
WSM	Samoa	2010	28213	0.113159	0.0511937	0.20642	0.114726	0.0519511	0.20902
AGO	Angola	1990	1590953	0.146658	0.0765511	0.235863	0.171709	0.0916468	0.270773
CAF	Central African Republic	1990	460894	0.190355	0.141831	0.2467	0.213793	0.160936	0.274489
COD	Democratic Republic of the Congo	1990	5506181	0.12509	0.0955414	0.155781	0.14197	0.108951	0.176037
COG	Congo	1990	371397	0.136924	0.0969708	0.182985	0.158012	0.112821	0.209765
GAB	Gabon	1990	150056	0.19836	0.148022	0.258355	0.223577	0.16887	0.287509
GNQ	Equatorial Guinea	1990	68867	0.12721	0.0660213	0.217401	0.169506	0.0919954	0.277141
AGO	Angola	2010	2986395	0.126801	0.0650628	0.207777	0.149357	0.0778093	0.241081
CAF	Central African Republic	2010	748588	0.156444	0.112137	0.209183	0.188082	0.137014	0.247812
COD	Democratic Republic of the Congo	2010	10200000	0.102332	0.077663	0.129747	0.122236	0.093283	0.153882
COG	Congo	2010	700868	0.118969	0.0843015	0.161061	0.135756	0.0969476	0.182312
GAB	Gabon	2010	270331	0.174235	0.128218	0.226506	0.194981	0.144546	0.251672
GNQ	Equatorial Guinea	2010	111291	0.141946	0.0755428	0.232232	0.146664	0.0778177	0.240723
BDI	Burundi	1990	954963	0.0715639	0.0498943	0.0966111	0.0850442	0.0597487	0.114141
COM	Comoros	1990	66803	0.117497	0.0833918	0.156846	0.142913	0.102601	0.189024
DJI	Djibouti	1990	91625	0.155278	0.110885	0.208698	0.176996	0.127324	0.236156
ERI	Eritrea	1990	476501	0.112565	0.0623612	0.184021	0.121165	0.0673881	0.196807
ETH	Ethiopia	1990	7625655	0.0891811	0.0693621	0.109844	0.102024	0.07956	0.125273
KEN	Kenya	1990	3500869	0.07407	0.0627332	0.0873365	0.0913444	0.0776987	0.107384
MDG	Madagascar	1990	1771809	0.0987292	0.0811699	0.118066	0.118325	0.097742	0.140623
MOZ	Mozambique	1990	2081245	0.157213	0.129518	0.184132	0.17621	0.14573	0.205399
MUS	Mauritius	1990	218736	0.102368	0.0571177	0.166152	0.115392	0.064738	0.18583
MWI	Malawi	1990	1558417	0.104841	0.0839665	0.127356	0.118591	0.0952531	0.143528
RWA	Rwanda	1990	1071891	0.0482726	0.0387192	0.0601997	0.0566513	0.045587	0.070495
SDN	Sudan	1990	4188173	0.112115	0.0909425	0.135131	0.126757	0.103296	0.151995
SOM	Somalia	1990	1070210	0.104299	0.0560708	0.166502	0.122182	0.0665859	0.192435
SYC	Seychelles	1990	12587	0.0921578	0.0474723	0.158069	0.113719	0.0596134	0.191383
TZA	United Republic of Tanzania	1990	3979123	0.118503	0.0994499	0.138961	0.136339	0.114658	0.159369
UGA	Uganda	1990	2648999	0.082163	0.0668539	0.0983137	0.0976095	0.0797515	0.116413
ZMB	Zambia	1990	1215486	0.0924112	0.0759366	0.112051	0.108232	0.0891725	0.130774
BDI	Burundi	2010	1558104	0.0575381	0.0393717	0.0810177	0.072917	0.0501933	0.101896
COM	Comoros	2010	126718	0.106633	0.0748095	0.14503	0.122464	0.086589	0.165337
DJI	Djibouti	2010	164530	0.13559	0.0978939	0.183832	0.153697	0.111702	0.20665
ERI	Eritrea	2010	988106	0.084315	0.0440301	0.142018	0.103832	0.0552244	0.171792
ETH	Ethiopia	2010	13700000	0.0747637	0.0592232	0.0923828	0.0877573	0.0697258	0.10806
KEN	Kenya	2010	7020201	0.0601111	0.0490024	0.0719693	0.0763526	0.0625173	0.0910593
MDG	Madagascar	2010	3366481	0.0897389	0.0738013	0.108613	0.101429	0.0835731	0.12223
MOZ	Mozambique	2010	3886343	0.136567	0.110567	0.164288	0.154383	0.125579	0.184948
MUS	Mauritius	2010	254574	0.102982	0.0563314	0.168098	0.0972598	0.0529775	0.159417
MWI	Malawi	2010	2263163	0.0802903	0.0630878	0.0979242	0.101028	0.0798776	0.122502
RWA	Rwanda	2010	1911103	0.0378024	0.0300053	0.0477335	0.0479005	0.0381717	0.0603588
SDN	Sudan	2010	7418416	0.0952648	0.0747264	0.11995	0.107806	0.0849717	0.135125
SOM	Somalia	2010	1504497	0.0954205	0.0508233	0.157117	0.106481	0.0572142	0.173822
SYC	Seychelles	2010	16508	0.102246	0.053278	0.173957	0.0967517	0.0502906	0.164981
TZA	United Republic of Tanzania	2010	7153772	0.0961835	0.0798211	0.113621	0.11736	0.097736	0.138237
UGA	Uganda	2010	5040070	0.0648745	0.0517955	0.0789895	0.0829359	0.0666176	0.100629
ZMB	Zambia	2010	2032612	0.0722807	0.0582592	0.0887691	0.0926182	0.0750542	0.112877
BWA	Botswana	1990	225513	0.107906	0.0556885	0.175372	0.12713	0.066746	0.203454
LSO	Lesotho	1990	268735	0.124374	0.100389	0.151099	0.140117	0.113545	0.169406
NAM	Namibia	1990	234792	0.0956127	0.075863	0.119416	0.114261	0.0910097	0.141865
SWZ	Swaziland	1990	144472	0.0919494	0.0639074	0.125644	0.107748	0.0752253	0.146412
ZAF	South Africa	1990	6505154	0.124252	0.0886944	0.163206	0.140185	0.100678	0.183017
ZWE	Zimbabwe	1990	1635063	0.0792499	0.0649157	0.0949892	0.098691	0.081307	0.117714
BWA	Botswana	2010	379070	0.0857781	0.0430296	0.142751	0.108037	0.0552147	0.176609
LSO	Lesotho	2010	387135	0.0909522	0.0729064	0.111277	0.119727	0.0966433	0.14538
NAM	Namibia	2010	413067	0.0843856	0.0660867	0.105045	0.0968103	0.0761569	0.120018
SWZ	Swaziland	2010	210251	0.0689342	0.0472838	0.0956823	0.0902936	0.0626098	0.124341
ZAF	South Africa	2010	9657157	0.107555	0.0746281	0.144577	0.119751	0.0834998	0.16004
ZWE	Zimbabwe	2010	2183203	0.0546523	0.0442112	0.0656633	0.0830188	0.0678053	0.0989437
BEN	Benin	1990	743994	0.0967241	0.0793199	0.115351	0.111428	0.0916908	0.132638
BFA	Burkina Faso	1990	1431696	0.0887077	0.0720781	0.106556	0.103475	0.0844008	0.124042
CIV	Côte d'Ivoire	1990	1820106	0.128915	0.105499	0.156534	0.147619	0.121211	0.17843
CMR	Cameroon	1990	1848473	0.158685	0.13324	0.185443	0.180108	0.151795	0.209625
CPV	Cape Verde	1990	54483	0.105378	0.0576142	0.167438	0.143079	0.0808753	0.21943
GHA	Ghana	1990	2305740	0.120256	0.100831	0.140738	0.139454	0.117449	0.162656
GIN	Guinea	1990	882875	0.150527	0.120704	0.182394	0.170937	0.138018	0.205927
GMB	Gambia	1990	161848	0.11117	0.0627586	0.17834	0.145306	0.084389	0.22684
GNB	Guinea-Bissau	1990	152904	0.140961	0.0821792	0.217755	0.147109	0.0865061	0.225506
LBR	Liberia	1990	330267	0.15935	0.127048	0.194702	0.185914	0.149187	0.22543
MLI	Mali	1990	1282209	0.122484	0.101832	0.143707	0.141528	0.118131	0.165519
MRT	Mauritania	1990	315218	0.123457	0.0967921	0.155976	0.143406	0.1131	0.180279
NER	Niger	1990	1213801	0.112571	0.0913232	0.138159	0.128372	0.104426	0.157238
NGA	Nigeria	1990	14900000	0.142685	0.121575	0.163891	0.160652	0.137367	0.183808
SEN	Senegal	1990	1062110	0.114842	0.0987318	0.133403	0.136537	0.117723	0.158173
SLE	Sierra Leone	1990	683798	0.177991	0.131659	0.230778	0.197808	0.147559	0.254617
STP	São Tomé and Príncipe	1990	17095	0.0853886	0.0582994	0.119641	0.106676	0.0735931	0.148094
TCD	Chad	1990	910851	0.140806	0.119532	0.164381	0.160673	0.137018	0.186647
TGO	Togo	1990	559269	0.0945889	0.0729577	0.118098	0.110525	0.0855319	0.137494
BEN	Benin	2010	1459822	0.0827185	0.0669397	0.100073	0.0958512	0.077803	0.115793
BFA	Burkina Faso	2010	2714538	0.076273	0.0618749	0.0937333	0.0895667	0.0729788	0.109559
CIV	Côte d'Ivoire	2010	3193600	0.10514	0.082909	0.128554	0.128226	0.101739	0.155619
CMR	Cameroon	2010	3352112	0.131365	0.107666	0.157549	0.155724	0.12819	0.185638
CPV	Cape Verde	2010	90338	0.107168	0.0588948	0.171728	0.122437	0.0677494	0.194778
GHA	Ghana	2010	4240320	0.106341	0.0887218	0.125601	0.120015	0.100495	0.141233
GIN	Guinea	2010	1596166	0.129304	0.103095	0.157448	0.150198	0.120457	0.181936
GMB	Gambia	2010	307529	0.106309	0.0591286	0.171689	0.126064	0.0711785	0.200211
GNB	Guinea-Bissau	2010	253416	0.10618	0.0611598	0.169464	0.128294	0.0751579	0.201125
LBR	Liberia	2010	661929	0.13984	0.109207	0.172821	0.162561	0.127914	0.199577
MLI	Mali	2010	2445561	0.104611	0.0865174	0.125418	0.123694	0.102759	0.147672
MRT	Mauritania	2010	610037	0.110562	0.0836792	0.142869	0.123944	0.0942424	0.159451
NER	Niger	2010	2305348	0.0968506	0.0777154	0.11839	0.11194	0.0900602	0.136514
NGA	Nigeria	2010	25700000	0.116614	0.0994537	0.134484	0.137847	0.117922	0.158638
SEN	Senegal	2010	2138446	0.101497	0.0840956	0.121377	0.118672	0.0988207	0.141401
SLE	Sierra Leone	2010	1023807	0.155878	0.115097	0.204921	0.17434	0.12968	0.227592
STP	São Tomé and Príncipe	2010	28790	0.0713551	0.0484816	0.100935	0.0906581	0.0622028	0.126902
TCD	Chad	2010	1756459	0.118554	0.098757	0.140028	0.140922	0.117972	0.165475
TGO	Togo	2010	1070193	0.0800951	0.0603228	0.102142	0.0944258	0.0715397	0.119938

## Sheet: Primary - all women
Prevalence of primary infertility among all women
County		Year	Total population, women aged 20-44 years	Prevalence of primary infertility			Age-standardized prevalence of primary infertility
ISO3 code	Country name			Estimate	Lower 95% uncertainty interval	Upper 95% uncertainty interval	Estimate	Lower 95% uncertainty interval	Upper 95% uncertainty interval
BRN	Brunei Darussalam	1990	48806	0.0089139	0.0031302	0.0193707	0.0088867	0.003145	0.0193222
JPN	Japan	1990	21800000	0.0087804	0.0031537	0.0182988	0.0086716	0.0030543	0.018362
KOR	Republic of Korea	1990	9041102	0.0076205	0.0043236	0.0122795	0.0076407	0.0043544	0.0122913
SGP	Singapore	1990	746131	0.0087704	0.0030881	0.0186006	0.0087619	0.0030878	0.018567
BRN	Brunei Darussalam	2010	91314	0.0082415	0.0023851	0.0197786	0.0081012	0.0023233	0.0197853
JPN	Japan	2010	20100000	0.0083317	0.0024959	0.020196	0.0080656	0.0023538	0.0195054
KOR	Republic of Korea	2010	9085255	0.0071635	0.003114	0.0141738	0.0070245	0.0030392	0.0137954
SGP	Singapore	2010	946395	0.0081968	0.0023704	0.0198982	0.0079571	0.0022606	0.0197521
ARM	Armenia	1990	705400	0.0103117	0.0063883	0.0151366	0.0102665	0.006353	0.0150518
AZE	Azerbaijan	1990	1370871	0.0139487	0.0081934	0.0222517	0.0137292	0.0080963	0.0218932
GEO	Georgia	1990	1017993	0.0114102	0.0050658	0.0210867	0.0114068	0.0050385	0.0210736
KAZ	Kazakhstan	1990	3129493	0.011295	0.0077067	0.0160475	0.0112579	0.0076927	0.0159972
KGZ	Kyrgyzstan	1990	761589	0.0103493	0.0062813	0.015918	0.0102349	0.0061955	0.0157504
MNG	Mongolia	1990	367975	0.0127387	0.0055303	0.0239611	0.0124493	0.0054758	0.0232744
TJK	Tajikistan	1990	861779	0.0121217	0.0054658	0.0227098	0.0118758	0.0053873	0.0222422
TKM	Turkmenistan	1990	643821	0.01208	0.005509	0.0220039	0.0118874	0.0054576	0.0216772
UZB	Uzbekistan	1990	3505111	0.0115604	0.0070883	0.0174752	0.0113077	0.0069183	0.0170681
ARM	Armenia	2010	597414	0.011945	0.008167	0.0170834	0.0118804	0.0081268	0.0169425
AZE	Azerbaijan	2010	1912075	0.0153763	0.0096431	0.022833	0.015362	0.0096516	0.0227832
GEO	Georgia	2010	796644	0.0133224	0.0059852	0.0252635	0.0133297	0.0060035	0.0253249
KAZ	Kazakhstan	2010	3179008	0.0127952	0.0080829	0.0197527	0.0127871	0.0080802	0.0197404
KGZ	Kyrgyzstan	2010	1044406	0.0120936	0.0071129	0.0195901	0.0119673	0.0070906	0.0193783
MNG	Mongolia	2010	601551	0.0146639	0.0064644	0.0281772	0.0145757	0.0064032	0.0277359
TJK	Tajikistan	2010	1261274	0.0137029	0.0058106	0.026151	0.0135567	0.0058503	0.0255461
TKM	Turkmenistan	2010	1016649	0.0136129	0.0058328	0.025145	0.0135279	0.0059026	0.0248566
UZB	Uzbekistan	2010	5446519	0.0135954	0.0077621	0.0217865	0.0134088	0.0076267	0.0214835
CHN	China	1990	222000000	0.0109864	0.0080383	0.0134648	0.0107946	0.0080178	0.0131285
HKG	China (Hong Kong SAR)	1990	1275108	0.0150395	0.0072971	0.0270297	0.0150727	0.0072788	0.0270249
MAC	China (Macao SAR)	1990	91641	0.0159793	0.007609	0.0282741	0.0158476	0.0075375	0.028096
PRK	Democratic People's Republic of Korea	1990	3819800	0.0158371	0.0072679	0.0287388	0.0155032	0.0072169	0.0281954
TWN	Taiwan	1990	4137632	0.0155245	0.0072755	0.0285048	0.0154207	0.00725	0.0282559
CHN	China	2010	269000000	0.0108504	0.0072682	0.0144505	0.0109406	0.0073287	0.0145878
HKG	China (Hong Kong SAR)	2010	1442541	0.0148908	0.00714	0.0272199	0.0152355	0.0072849	0.027892
MAC	China (Macao SAR)	2010	128931	0.0155825	0.0071034	0.0284281	0.0158244	0.007189	0.0289002
PRK	Democratic People's Republic of Korea	2010	4621049	0.0153259	0.0069713	0.0277442	0.0155034	0.0070139	0.0280423
TWN	Taiwan	2010	4526507	0.0151448	0.0066374	0.0277446	0.015349	0.0067247	0.0281782
AFG	Afghanistan	1990	1912520	0.0244915	0.0121217	0.0425521	0.0239634	0.0120513	0.0415265
BGD	Bangladesh	1990	16400000	0.016899	0.0142979	0.0198481	0.0164519	0.013906	0.0192951
BTN	Bhutan	1990	83780	0.0234543	0.0115192	0.0416481	0.0231076	0.0113922	0.0410097
IND	India	1990	147000000	0.0248805	0.0205081	0.029917	0.0245495	0.0202545	0.0295379
NPL	Nepal	1990	3017931	0.019952	0.0167615	0.0237179	0.0195524	0.0164584	0.0232407
PAK	Pakistan	1990	17000000	0.0334057	0.0276651	0.0391818	0.032611	0.0270072	0.0383497
AFG	Afghanistan	2010	4667212	0.0213198	0.0104066	0.0380227	0.0207336	0.0100487	0.0369582
BGD	Bangladesh	2010	29700000	0.0136958	0.0112657	0.0164552	0.0135601	0.0111726	0.0163009
BTN	Bhutan	2010	135335	0.0195306	0.0095426	0.0349699	0.0190826	0.0093546	0.0340474
IND	India	2010	226000000	0.0202117	0.0161881	0.0246053	0.0200387	0.0160396	0.0243835
NPL	Nepal	2010	5504228	0.0163966	0.0133719	0.0197185	0.0161478	0.0131651	0.0194388
PAK	Pakistan	2010	31400000	0.0273731	0.0213464	0.0339153	0.0266716	0.0208505	0.0330087
IDN	Indonesia	1990	32800000	0.0233535	0.0203129	0.0268136	0.0228327	0.0198667	0.026203
KHM	Cambodia	1990	1726783	0.0114418	0.0087614	0.0145094	0.011339	0.0087156	0.0143843
LAO	Lao People's Democratic Republic	1990	653839	0.0183604	0.0097747	0.0309802	0.0178647	0.0095239	0.0301956
LKA	Sri Lanka	1990	3287496	0.0153471	0.0106441	0.0208801	0.0151754	0.0105413	0.020664
MDV	Maldives	1990	30633	0.020888	0.0149629	0.0289585	0.0200881	0.0144059	0.0279661
MMR	Myanmar	1990	7158896	0.0173104	0.0090001	0.0301638	0.0169959	0.0088653	0.0295642
MYS	Malaysia	1990	3394366	0.0128407	0.0089134	0.0176534	0.0126776	0.0087896	0.0174428
PHL	Philippines	1990	10600000	0.0163708	0.0137397	0.0194185	0.0161654	0.0135884	0.0191638
THA	Thailand	1990	11500000	0.0190776	0.0131297	0.0265694	0.0188512	0.012974	0.0263065
TLS	Timor-Leste	1990	134719	0.0151067	0.0102001	0.0218197	0.0148604	0.0100731	0.0214752
VNM	Viet Nam	1990	12200000	0.0118577	0.0086205	0.0159637	0.0114722	0.0083417	0.0154617
IDN	Indonesia	2010	49600000	0.0229456	0.0190417	0.0278331	0.0229423	0.0190406	0.0278244
KHM	Cambodia	2010	2700144	0.0116694	0.009274	0.0145241	0.0115456	0.0092058	0.014343
LAO	Lao People's Democratic Republic	2010	1153956	0.0188966	0.0099711	0.0324944	0.018472	0.0097282	0.0318015
LKA	Sri Lanka	2010	3975404	0.0153969	0.0103156	0.0217493	0.0154368	0.0103446	0.0218234
MDV	Maldives	2010	69409	0.0215247	0.0153369	0.0302902	0.0209827	0.0149644	0.0295089
MMR	Myanmar	2010	10100000	0.0174195	0.0089874	0.0302916	0.0173974	0.0089844	0.0302361
MYS	Malaysia	2010	5282778	0.0126104	0.0079714	0.0186641	0.0125528	0.0079468	0.0185747
PHL	Philippines	2010	16900000	0.0168449	0.0134361	0.0205453	0.0167115	0.0133919	0.0203491
THA	Thailand	2010	13700000	0.0190842	0.0122902	0.0272414	0.0193074	0.0124302	0.0276115
TLS	Timor-Leste	2010	154657	0.0152423	0.0105176	0.0214241	0.0149311	0.0103406	0.0209222
VNM	Viet Nam	2010	18500000	0.0121824	0.0087378	0.0163182	0.0120456	0.0086392	0.0161334
AUS	Australia	1990	3350690	0.0119751	0.0032336	0.0292891	0.0118758	0.0031789	0.0291833
NZL	New Zealand	1990	661955	0.0117513	0.0031834	0.0284171	0.0116994	0.0031595	0.0282489
AUS	Australia	2010	3935996	0.0109971	0.0026711	0.0267418	0.0108823	0.0026223	0.0266212
NZL	New Zealand	2010	759593	0.0105571	0.0024912	0.0264372	0.0104154	0.0024263	0.0261548
ATG	Antigua and Barbuda	1990	11863	0.0166298	0.0073469	0.030669	0.0165241	0.0073828	0.0302558
BHS	Bahamas	1990	51215	0.0173431	0.007642	0.0323451	0.017224	0.0076365	0.031955
BLZ	Belize	1990	30861	0.0170889	0.010859	0.0253363	0.0168021	0.0106916	0.0248719
BRB	Barbados	1990	54938	0.0186852	0.008607	0.0337985	0.0185942	0.0085735	0.0336059
CUB	Cuba	1990	2138337	0.0173012	0.0078473	0.0314718	0.0171785	0.0078966	0.0310617
DMA	Dominica	1990	13528	0.018534	0.0083047	0.0340884	0.0183865	0.0082966	0.0335786
DOM	Dominican Republic	1990	1268920	0.0171917	0.0142114	0.0203985	0.0170952	0.0141716	0.0202619
GRD	Grenada	1990	14536	0.0185705	0.0085716	0.0329375	0.0184247	0.0086041	0.0325341
GUY	Guyana	1990	141994	0.0182296	0.0122611	0.0259063	0.0180475	0.012158	0.0256482
HTI	Haiti	1990	1165516	0.0221049	0.017863	0.0267013	0.0219408	0.0177488	0.0264143
JAM	Jamaica	1990	423054	0.0184231	0.0120107	0.0264986	0.0182775	0.0119108	0.0262408
LCA	Saint Lucia	1990	23550	0.0181485	0.0082066	0.0340166	0.017973	0.0082473	0.0335764
PRI	Puerto Rico	1990	670622	0.0171528	0.0077145	0.031599	0.0171573	0.0077165	0.0316102
SUR	Suriname	1990	74816	0.0192633	0.0089513	0.0339692	0.0190547	0.0088815	0.0337122
TTO	Trinidad and Tobago	1990	234127	0.0248107	0.0188185	0.0321832	0.0245884	0.0186565	0.0319194
VCT	Saint Vincent and the Grenadines	1990	18040	0.0184855	0.0084515	0.03435	0.0182696	0.0084645	0.0336828
ATG	Antigua and Barbuda	2010	17722	0.0143296	0.0059197	0.0274825	0.0143778	0.0059021	0.0276452
BHS	Bahamas	2010	68519	0.0148457	0.0062717	0.0281071	0.0148637	0.0062748	0.0281302
BLZ	Belize	2010	57898	0.0147022	0.0091595	0.022214	0.0146367	0.0091395	0.0220698
BRB	Barbados	2010	48581	0.0156457	0.0069042	0.0295028	0.0157089	0.0069139	0.029633
CUB	Cuba	2010	2097016	0.0145838	0.0064191	0.027915	0.0147226	0.0064824	0.0283584
DMA	Dominica	2010	13536	0.0154479	0.0066076	0.0290409	0.0155085	0.0066109	0.0291482
DOM	Dominican Republic	2010	1839056	0.0140806	0.0111489	0.0174445	0.0140911	0.0111487	0.0174369
GRD	Grenada	2010	19806	0.0156228	0.0067558	0.0290792	0.0155459	0.0068	0.0286715
GUY	Guyana	2010	137436	0.0151049	0.0093975	0.0229034	0.0151025	0.0093931	0.0229023
HTI	Haiti	2010	1830740	0.0185915	0.0144509	0.0232143	0.0185022	0.0144073	0.0230995
JAM	Jamaica	2010	504850	0.0158005	0.0096798	0.0239945	0.0158436	0.0097051	0.0240307
LCA	Saint Lucia	2010	36090	0.0155612	0.0068615	0.0306587	0.015539	0.0069125	0.0305228
PRI	Puerto Rico	2010	677170	0.0146271	0.0063625	0.0276778	0.0146542	0.0063485	0.0277627
SUR	Suriname	2010	98754	0.0165486	0.0074245	0.0291836	0.0165482	0.0074491	0.0291647
TTO	Trinidad and Tobago	2010	287698	0.0215604	0.0153211	0.0295684	0.0214691	0.015285	0.0294281
VCT	Saint Vincent and the Grenadines	2010	20474	0.015423	0.0065165	0.0298877	0.0154009	0.0065349	0.0297221
ALB	Albania	1990	599992	0.0098378	0.0058917	0.0148686	0.0096764	0.0057991	0.0146616
BGR	Bulgaria	1990	1520669	0.0093856	0.0043632	0.0178005	0.0094725	0.0043876	0.0180049
BIH	Bosnia and Herzegovina	1990	855854	0.0105485	0.0048704	0.020079	0.0105285	0.0048577	0.0200431
CZE	Czech Republic	1990	1831850	0.0104391	0.0061454	0.0167593	0.0105598	0.0062245	0.0169003
HRV	Croatia	1990	815400	0.0100484	0.0045453	0.0194295	0.0101439	0.0045398	0.0196077
HUN	Hungary	1990	1812097	0.0094083	0.0043379	0.0173258	0.0095239	0.0043544	0.0175383
MKD	Macedonia (Former Yugoslav Republic of)	1990	363000	0.0101171	0.0045727	0.019425	0.0101264	0.0045714	0.0194412
MNE	Montenegro	1990	111382	0.0098363	0.0043782	0.0185753	0.0098566	0.0043792	0.0186551
POL	Poland	1990	7099019	0.0051874	0.0030889	0.0078398	0.0052218	0.0030912	0.0079201
ROU	Romania	1990	4059711	0.00947	0.0041251	0.0179461	0.009494	0.0041433	0.017972
SRB	Serbia	1990	1701112	0.0100115	0.0043002	0.0196117	0.0100883	0.0043171	0.0198209
SVK	Slovakia	1990	970225	0.0096075	0.0044113	0.0179476	0.0096614	0.0044298	0.0179989
SVN	Slovenia	1990	362168	0.011005	0.0066732	0.0170871	0.0110752	0.006722	0.0172002
ALB	Albania	2010	613960	0.0112748	0.0078021	0.0155213	0.0111985	0.0077557	0.0154178
BGR	Bulgaria	2010	1312499	0.0109581	0.0047111	0.0217967	0.0110125	0.004689	0.0219315
BIH	Bosnia and Herzegovina	2010	720627	0.0117454	0.0048764	0.0225964	0.0118045	0.0048855	0.022718
CZE	Czech Republic	2010	1921236	0.0123634	0.0067963	0.021148	0.0123959	0.0067851	0.0211931
HRV	Croatia	2010	739244	0.0113579	0.0047851	0.0233587	0.0114139	0.0047936	0.0234413
HUN	Hungary	2010	1790311	0.0110503	0.0047419	0.0219094	0.0111098	0.0047387	0.0220807
MKD	Macedonia (Former Yugoslav Republic of)	2010	382723	0.0114915	0.0049235	0.0219764	0.0115161	0.0049167	0.0220445
MNE	Montenegro	2010	114758	0.0113127	0.0049147	0.0223041	0.0113208	0.0049139	0.0223316
POL	Poland	2010	7055315	0.0061388	0.0031466	0.0108056	0.0061179	0.0031316	0.0107643
ROU	Romania	2010	4208905	0.0108426	0.0044683	0.0216209	0.010903	0.0044708	0.0217048
SRB	Serbia	2010	1744876	0.0115332	0.0048343	0.0238528	0.0115633	0.0048413	0.0240636
SVK	Slovakia	2010	1057224	0.0110173	0.0044997	0.0221798	0.0110248	0.0044922	0.0221762
SVN	Slovenia	2010	353876	0.0126434	0.0068867	0.0214168	0.0127211	0.0068873	0.02152
BLR	Belarus	1990	1877708	0.017278	0.0074752	0.0337052	0.0173184	0.0074289	0.0339458
EST	Estonia	1990	280205	0.0176185	0.0074702	0.0343079	0.0177358	0.0074883	0.0347485
LTU	Lithuania	1990	673391	0.014338	0.0085286	0.0222964	0.014322	0.0085071	0.022287
LVA	Latvia	1990	468815	0.0171956	0.0073603	0.0341392	0.0172254	0.0073776	0.0341539
MDA	Moldova	1990	822914	0.0213427	0.0145388	0.0296228	0.0214805	0.0146527	0.0298223
RUS	Russian Federation	1990	27800000	0.0170196	0.0076654	0.0319809	0.0171245	0.0076763	0.0325067
UKR	Ukraine	1990	9123935	0.0185847	0.0117727	0.0268509	0.0186241	0.0118066	0.0268822
BLR	Belarus	2010	1832751	0.020033	0.0079025	0.0384736	0.0200451	0.0078957	0.038504
EST	Estonia	2010	240767	0.0205958	0.0079647	0.0408411	0.0206244	0.007977	0.0408994
LTU	Lithuania	2010	601830	0.0162584	0.0092153	0.0264949	0.0163173	0.0092589	0.0265906
LVA	Latvia	2010	411264	0.0199425	0.0080704	0.0390045	0.0199712	0.0080858	0.0390333
MDA	Moldova	2010	676652	0.0250816	0.0176802	0.035104	0.0249627	0.0176166	0.0349249
RUS	Russian Federation	2010	27700000	0.019476	0.0080216	0.0366922	0.0194469	0.0080153	0.036633
UKR	Ukraine	2010	8505447	0.0210522	0.0150454	0.0284099	0.0210388	0.015023	0.0283568
AND	Andorra	1990	9450	0.0121722	0.0055796	0.0224865	0.0122487	0.005637	0.0225374
AUT	Austria	1990	1445226	0.0128874	0.0059739	0.0239434	0.0129211	0.0060029	0.0239758
BEL	Belgium	1990	1837513	0.0172011	0.0114871	0.0248436	0.016992	0.0113416	0.0246005
CHE	Switzerland	1990	1279589	0.0126053	0.0056686	0.0248391	0.0124697	0.0055492	0.0246506
CYP	Cyprus	1990	142854	0.0121095	0.0056445	0.0219409	0.0121323	0.0056541	0.021972
DEU	Germany	1990	14500000	0.0113839	0.0071006	0.0176111	0.0114327	0.0071375	0.017652
DNK	Denmark	1990	949780	0.0107623	0.0061793	0.0169758	0.0106159	0.0060869	0.0167757
ESP	Spain	1990	6963284	0.0110571	0.0075487	0.0152996	0.0111284	0.0075965	0.0153957
FIN	Finland	1990	956735	0.012437	0.0085834	0.0172429	0.0119602	0.0082236	0.0165979
FRA	France	1990	10600000	0.012937	0.0059868	0.0243975	0.0127761	0.0058564	0.0241376
GBR	United Kingdom	1990	10600000	0.0121164	0.0053261	0.022128	0.0120921	0.0053126	0.022092
GRC	Greece	1990	1780389	0.0130146	0.0059384	0.0246816	0.0129817	0.0059066	0.0245691
IRL	Ireland	1990	613993	0.0123385	0.0055878	0.0225677	0.012303	0.0055742	0.0225162
ISL	Iceland	1990	48394	0.0124776	0.0057633	0.0232846	0.0124705	0.0057622	0.0232597
ISR	Israel	1990	790841	0.0121991	0.0054075	0.0226593	0.0121814	0.0053965	0.0226316
ITA	Italy	1990	10400000	0.0095401	0.0065445	0.0133983	0.0095463	0.0065496	0.0134023
LUX	Luxembourg	1990	74231	0.0130394	0.0061335	0.0249845	0.0128484	0.0060136	0.024606
MLT	Malta	1990	72947	0.0127882	0.005944	0.0233612	0.0123826	0.0056395	0.0227554
NLD	Netherlands	1990	2977799	0.0128208	0.0058315	0.0240261	0.0127464	0.0057696	0.0238849
NOR	Norway	1990	778370	0.0120087	0.0053185	0.0226297	0.0119333	0.0052809	0.0224978
PRT	Portugal	1990	1764646	0.0164222	0.0113445	0.0225742	0.0164092	0.0113339	0.0225772
SWE	Sweden	1990	1482688	0.0120095	0.0054602	0.0220484	0.0118407	0.0053725	0.0219101
AND	Andorra	2010	15754	0.0114977	0.0046822	0.0236909	0.0109245	0.0043877	0.0224714
AUT	Austria	2010	1441953	0.012114	0.0048767	0.0251596	0.0117562	0.0046887	0.0246201
BEL	Belgium	2010	1745875	0.0158026	0.008703	0.0258952	0.0153305	0.0084216	0.0251447
CHE	Switzerland	2010	1329228	0.0120623	0.0049848	0.0250186	0.0116223	0.0046789	0.0246537
CYP	Cyprus	2010	208435	0.0107651	0.0043451	0.0219736	0.0107482	0.0043499	0.0219457
DEU	Germany	2010	13200000	0.0105654	0.0056762	0.0177017	0.0102565	0.0054707	0.0172313
DNK	Denmark	2010	886726	0.0101013	0.0050873	0.017537	0.0096887	0.0048248	0.0168368
ESP	Spain	2010	8553943	0.0100296	0.0060509	0.0151573	0.0094952	0.0056979	0.014359
FIN	Finland	2010	817073	0.0108173	0.0057766	0.0174403	0.0105543	0.0056322	0.0170438
FRA	France	2010	10200000	0.0116344	0.0046338	0.0235152	0.0113988	0.0045084	0.0232546
GBR	United Kingdom	2010	10500000	0.0111916	0.0044021	0.0226981	0.0109765	0.0042548	0.0222838
GRC	Greece	2010	1991775	0.0119553	0.0047399	0.024067	0.0114336	0.0044168	0.0236409
IRL	Ireland	2010	842869	0.011347	0.0043877	0.0220687	0.0110513	0.0042514	0.0217175
ISL	Iceland	2010	55438	0.0112147	0.0044514	0.0228903	0.0111316	0.0044004	0.022745
ISR	Israel	2010	1289316	0.0109957	0.0042178	0.0225277	0.0109616	0.0041993	0.0224478
ITA	Italy	2010	10100000	0.0090543	0.0053564	0.0142917	0.0085083	0.0049825	0.0135464
LUX	Luxembourg	2010	92117	0.0120711	0.0046888	0.0237442	0.0116075	0.0044025	0.0231065
MLT	Malta	2010	71143	0.0110876	0.0043544	0.0227956	0.0110749	0.0043472	0.0227691
NLD	Netherlands	2010	2701428	0.0118001	0.0049409	0.0242839	0.011423	0.0046887	0.0238652
NOR	Norway	2010	809932	0.0109107	0.0043466	0.0213529	0.0105904	0.0041351	0.0208888
PRT	Portugal	2010	1886590	0.0150663	0.0081407	0.0257467	0.0147695	0.0079804	0.0253884
SWE	Sweden	2010	1503332	0.0110063	0.0043918	0.022206	0.0108025	0.0042618	0.0219668
BOL	Bolivia	1990	1107977	0.0071209	0.0057385	0.0087784	0.0070588	0.005686	0.008688
ECU	Ecuador	1990	1774552	0.0074822	0.0059016	0.0094004	0.0074292	0.0058498	0.009335
PER	Peru	1990	3770586	0.0063394	0.0050827	0.0076868	0.0062909	0.0050488	0.0076449
BOL	Bolivia	2010	1752051	0.0059597	0.0047974	0.0074219	0.0059386	0.0047875	0.0073972
ECU	Ecuador	2010	2747366	0.0063345	0.0048312	0.0079664	0.0063228	0.00482	0.007957
PER	Peru	2010	5543150	0.005288	0.0040603	0.0066955	0.005281	0.0040571	0.0066869
COL	Colombia	1990	6382337	0.009907	0.0083097	0.0116639	0.0099018	0.0083065	0.0116422
CRI	Costa Rica	1990	576743	0.0094748	0.0061848	0.0141713	0.0094332	0.0061642	0.0141322
GTM	Guatemala	1990	1334398	0.0088567	0.0064417	0.0115696	0.0087535	0.0063848	0.0114492
HND	Honduras	1990	771005	0.0093742	0.0072363	0.0117808	0.0092856	0.0071718	0.0116214
MEX	Mexico	1990	14600000	0.0083584	0.0061912	0.0110502	0.0082886	0.0061365	0.0109696
NIC	Nicaragua	1990	638056	0.0085297	0.0062803	0.0112277	0.0084586	0.0062575	0.0111418
PAN	Panama	1990	439797	0.0079907	0.0051542	0.0118604	0.0079601	0.0051614	0.0118091
SLV	El Salvador	1990	878811	0.0072364	0.0055994	0.0091717	0.007218	0.0055639	0.0091175
VEN	Venezuela (Bolivarian Republic of)	1990	3588059	0.0081691	0.0052143	0.0121664	0.0081538	0.0051933	0.0121014
COL	Colombia	2010	9018195	0.0084528	0.0069578	0.010268	0.0084631	0.0069677	0.0102867
CRI	Costa Rica	2010	913606	0.0079245	0.0049054	0.0122453	0.0079425	0.0049162	0.0122894
GTM	Guatemala	2010	2489109	0.0077085	0.0054886	0.0103619	0.0076408	0.0054355	0.0102445
HND	Honduras	2010	1388245	0.0078969	0.0060501	0.0100415	0.0078715	0.0060316	0.00999
MEX	Mexico	2010	22200000	0.0069403	0.0048004	0.0096473	0.006942	0.0048011	0.0096513
NIC	Nicaragua	2010	1100139	0.0072673	0.0053096	0.0095865	0.007247	0.0053002	0.0095577
PAN	Panama	2010	664841	0.0067887	0.0041683	0.0103735	0.0067954	0.0041722	0.0103858
SLV	El Salvador	2010	1194261	0.006023	0.0046599	0.0078692	0.0060374	0.0046646	0.0079091
VEN	Venezuela (Bolivarian Republic of)	2010	5522082	0.0067544	0.0040602	0.0105121	0.0067643	0.0040633	0.0105333
ARG	Argentina	1990	5543327	0.0127227	0.004037	0.0308855	0.0127207	0.0040374	0.0308869
CHL	Chile	1990	2614130	0.0126979	0.0038288	0.0313498	0.0126263	0.0038254	0.0311065
URY	Uruguay	1990	528700	0.0131639	0.0038668	0.0335794	0.0131546	0.0038632	0.0335612
ARG	Argentina	2010	7377629	0.0110535	0.0032079	0.0270273	0.0110357	0.0032038	0.0269735
CHL	Chile	2010	3193049	0.0107977	0.0031318	0.0270715	0.0108261	0.0031458	0.0271342
URY	Uruguay	2010	577893	0.0113964	0.0031956	0.0304733	0.0114106	0.003192	0.0304906
BRA	Brazil	1990	28300000	0.0123186	0.0093893	0.0158339	0.0122582	0.0093571	0.0157246
PRY	Paraguay	1990	703802	0.0145031	0.0104435	0.0193963	0.0144132	0.0104018	0.019277
BRA	Brazil	2010	39200000	0.0102042	0.0074223	0.0135953	0.010188	0.0074102	0.0135809
PRY	Paraguay	2010	1170324	0.0122021	0.0084078	0.0168374	0.0121722	0.0084038	0.0167695
ARE	United Arab Emirates	1990	243154	0.0211699	0.0107951	0.0368153	0.0211784	0.0107831	0.0369268
BHR	Bahrain	1990	87717	0.0216407	0.011279	0.0385399	0.0213583	0.0111305	0.0380603
DZA	Algeria	1990	4055537	0.0203546	0.0153353	0.0262331	0.0197816	0.0149247	0.0254883
EGY	Egypt	1990	9375821	0.0251943	0.0221702	0.0286133	0.0248584	0.0218924	0.0282256
IRN	Iran (Islamic Republic of)	1990	8488443	0.0229247	0.0117582	0.0394504	0.0224077	0.0115864	0.0384957
IRQ	Iraq	1990	2628040	0.0236975	0.0121501	0.0395363	0.0229139	0.0117368	0.0383097
JOR	Jordan	1990	446547	0.026573	0.0219432	0.0317175	0.0253631	0.0209285	0.0302733
KWT	Kuwait	1990	399765	0.0222762	0.0115578	0.0387721	0.0219384	0.0113894	0.0381697
LBN	Lebanon	1990	555461	0.0245567	0.0187524	0.0317888	0.024078	0.0183771	0.0310921
LBY	Libyan Arab Jamahiriya	1990	635537	0.0234721	0.0161376	0.0321424	0.022677	0.01555	0.0310447
MAR	Morocco	1990	4293180	0.0258397	0.0217307	0.030483	0.0255376	0.0214584	0.0301061
OMN	Oman	1990	236780	0.023293	0.0123697	0.0394697	0.0229003	0.0121476	0.0386382
PSE	Occupied Palestinian Territory	1990	310591	0.0217179	0.011177	0.0371262	0.0210237	0.0108096	0.0358761
QAT	Qatar	1990	63967	0.0212597	0.0108915	0.0361479	0.0213815	0.0109365	0.0363517
SAU	Saudi Arabia	1990	2294133	0.0232693	0.012359	0.0396394	0.0227006	0.0120795	0.0387163
SYR	Syrian Arab Republic	1990	1857064	0.0201118	0.0159039	0.0245978	0.0193362	0.0153347	0.023693
TUN	Tunisia	1990	1423484	0.0246967	0.0198095	0.0304243	0.0240616	0.0192791	0.0296518
TUR	Turkey	1990	9804430	0.0224549	0.018464	0.0268108	0.0220702	0.0181605	0.0263734
YEM	Yemen	1990	1658958	0.0272425	0.0213435	0.034017	0.0265006	0.0207893	0.0330873
ARE	United Arab Emirates	2010	1259902	0.0198473	0.0101152	0.0346877	0.0196271	0.00999	0.0343323
BHR	Bahrain	2010	232985	0.0199312	0.0101964	0.0356934	0.0198723	0.010175	0.0355871
DZA	Algeria	2010	7573851	0.0190291	0.0141113	0.024941	0.0188244	0.0139729	0.0246735
EGY	Egypt	2010	15200000	0.0237716	0.0199241	0.0281687	0.0233823	0.0195623	0.0277209
IRN	Iran (Islamic Republic of)	2010	17100000	0.0214278	0.0105364	0.0372291	0.0209879	0.0103895	0.0361551
IRQ	Iraq	2010	5295070	0.0229338	0.0118721	0.0391737	0.0225599	0.0117338	0.0385573
JOR	Jordan	2010	1126787	0.0244006	0.0204432	0.0292002	0.0237341	0.0198919	0.0283626
KWT	Kuwait	2010	517244	0.0207834	0.0106874	0.0368469	0.0207923	0.0106543	0.0368761
LBN	Lebanon	2010	868531	0.022735	0.0169671	0.0298433	0.0227778	0.0169964	0.0299062
LBY	Libyan Arab Jamahiriya	2010	1369810	0.0214536	0.0146283	0.0301623	0.0213768	0.0145925	0.0300874
MAR	Morocco	2010	6609684	0.0245513	0.0193161	0.0303748	0.0244352	0.0192256	0.0302452
OMN	Oman	2010	502377	0.0217988	0.0112365	0.0378066	0.0213151	0.0109831	0.0369578
PSE	Occupied Palestinian Territory	2010	658667	0.0200181	0.0101717	0.0352477	0.0196458	0.0100771	0.0347969
QAT	Qatar	2010	230487	0.0200133	0.0099363	0.0344513	0.0200515	0.009957	0.0345808
SAU	Saudi Arabia	2010	5061035	0.0211714	0.0109987	0.0371324	0.0210134	0.0109476	0.0368441
SYR	Syrian Arab Republic	2010	3613925	0.0186849	0.0143475	0.0237204	0.0183612	0.0140985	0.0232772
TUN	Tunisia	2010	2212832	0.0230925	0.0180366	0.0292805	0.0229281	0.0179114	0.029064
TUR	Turkey	2010	14700000	0.0207755	0.0163191	0.0258153	0.0207568	0.0163089	0.0257958
YEM	Yemen	2010	3869641	0.0274062	0.0206854	0.0347819	0.0264126	0.0200416	0.0335476
CAN	Canada	1990	5746364	0.0112208	0.0042876	0.0239906	0.01101	0.0041741	0.0235152
USA	United States of America	1990	50800000	0.009879	0.0075263	0.0127031	0.0096488	0.0073459	0.0124092
CAN	Canada	2010	5764270	0.0100361	0.003498	0.0211133	0.0098608	0.0034083	0.0209033
USA	United States of America	2010	51400000	0.0090072	0.0062748	0.0127907	0.0088806	0.0061703	0.0125992
FJI	Fiji	1990	133544	0.0291286	0.0200824	0.0408413	0.0287019	0.0197571	0.0403189
FSM	Micronesia (Federated States of)	1990	15167	0.0244948	0.0104047	0.048031	0.0239199	0.0102068	0.0466924
KIR	Kiribati	1990	13990	0.0242451	0.0105516	0.0499164	0.0238883	0.010369	0.0494053
MHL	Marshall Islands	1990	9210	0.0244626	0.0105232	0.0491178	0.0240981	0.0103624	0.0484628
PNG	Papua New Guinea	1990	676209	0.0274203	0.0113978	0.054991	0.026841	0.0111973	0.0538511
SLB	Solomon Islands	1990	46353	0.0266102	0.010739	0.0535806	0.0260154	0.010674	0.0525306
TON	Tonga	1990	15617	0.0231938	0.0095602	0.0489557	0.0223765	0.0092954	0.0468976
VUT	Vanuatu	1990	24274	0.0256506	0.0103034	0.0531384	0.0252117	0.0101305	0.052172
WSM	Samoa	1990	23710	0.0228369	0.0094855	0.0456231	0.0223214	0.0094429	0.0444402
FJI	Fiji	2010	159746	0.029801	0.0186957	0.0450085	0.0295793	0.0185625	0.044664
FSM	Micronesia (Federated States of)	2010	18514	0.0249972	0.0098932	0.0508023	0.0242509	0.0096306	0.0490645
KIR	Kiribati	2010	19704	0.0237522	0.0096424	0.0481486	0.0239763	0.0097014	0.0485302
MHL	Marshall Islands	2010	10696	0.0247009	0.009989	0.050403	0.0249419	0.010073	0.050967
PNG	Papua New Guinea	2010	1209857	0.02779	0.0109946	0.0587654	0.0275028	0.0108845	0.0581069
SLB	Solomon Islands	2010	92254	0.0268141	0.0108007	0.0547827	0.0264347	0.0106329	0.0540608
TON	Tonga	2010	17549	0.0231172	0.0089906	0.0498345	0.0229759	0.0089461	0.0494452
VUT	Vanuatu	2010	41925	0.0260937	0.0103175	0.0541258	0.0256865	0.0102258	0.0535155
WSM	Samoa	2010	28213	0.0228357	0.0090705	0.0467931	0.0227633	0.0090797	0.0466346
AGO	Angola	1990	1590953	0.0284016	0.0129699	0.0543624	0.0280302	0.0128737	0.0536899
CAF	Central African Republic	1990	460894	0.0410944	0.0293477	0.0548652	0.0407036	0.0290175	0.0543045
COD	Democratic Republic of the Congo	1990	5506181	0.021602	0.0165057	0.027665	0.0213605	0.0163532	0.0273231
COG	Congo	1990	371397	0.0225894	0.0153577	0.031873	0.0224031	0.015169	0.031577
GAB	Gabon	1990	150056	0.0270823	0.0184397	0.0381177	0.0269242	0.0183766	0.037852
GNQ	Equatorial Guinea	1990	68867	0.0269165	0.0123281	0.0498263	0.0263923	0.0121971	0.048491
AGO	Angola	2010	2986395	0.0182041	0.0078807	0.0356454	0.0180661	0.0079119	0.0351499
CAF	Central African Republic	2010	748588	0.0267754	0.018665	0.0365641	0.0265773	0.0185536	0.0363815
COD	Democratic Republic of the Congo	2010	10200000	0.0137691	0.0105114	0.0178502	0.0136735	0.0104603	0.0177074
COG	Congo	2010	700868	0.0138606	0.0093449	0.0195214	0.0138256	0.0093122	0.0194167
GAB	Gabon	2010	270331	0.016364	0.0111123	0.0232964	0.0163899	0.0111531	0.023341
GNQ	Equatorial Guinea	2010	111291	0.0166872	0.0072309	0.0324225	0.0167047	0.007388	0.0321527
BDI	Burundi	1990	954963	0.0151261	0.0100651	0.0216145	0.0149072	0.0099295	0.0212366
COM	Comoros	1990	66803	0.0238523	0.0160343	0.0339503	0.0235552	0.0158756	0.0334979
DJI	Djibouti	1990	91625	0.0283659	0.0191673	0.0402226	0.0277721	0.0187565	0.0392675
ERI	Eritrea	1990	476501	0.019737	0.0102484	0.0337832	0.0195642	0.0102263	0.033207
ETH	Ethiopia	1990	7625655	0.0203637	0.0159242	0.0254749	0.0200743	0.0157051	0.0251078
KEN	Kenya	1990	3500869	0.0109846	0.009027	0.0131661	0.0107995	0.008868	0.0129216
MDG	Madagascar	1990	1771809	0.0256449	0.0207696	0.0311361	0.0253329	0.0205192	0.0307543
MOZ	Mozambique	1990	2081245	0.0294926	0.0226528	0.0378604	0.0290559	0.0223383	0.0372915
MUS	Mauritius	1990	218736	0.0174999	0.0083132	0.0306918	0.0172921	0.0082823	0.0300129
MWI	Malawi	1990	1558417	0.0160817	0.0124668	0.0201574	0.0158508	0.0122819	0.0198114
RWA	Rwanda	1990	1071891	0.0106073	0.0082786	0.0132798	0.0105435	0.0082235	0.0132112
SDN	Sudan	1990	4188173	0.0224233	0.0181945	0.0275621	0.0220676	0.0179383	0.0271047
SOM	Somalia	1990	1070210	0.0204721	0.0108951	0.0353185	0.0201539	0.0107957	0.0346892
SYC	Seychelles	1990	12587	0.0166245	0.0078231	0.0302483	0.0163815	0.0078311	0.0297337
TZA	United Republic of Tanzania	1990	3979123	0.0191128	0.0157262	0.0230879	0.0188304	0.0155029	0.022705
UGA	Uganda	1990	2648999	0.0191856	0.0154444	0.0234618	0.0189027	0.0152255	0.0230934
ZMB	Zambia	1990	1215486	0.0161892	0.0132547	0.0198547	0.015993	0.013088	0.0195816
BDI	Burundi	2010	1558104	0.0100444	0.006403	0.0147116	0.0098887	0.0063577	0.0143952
COM	Comoros	2010	126718	0.0148113	0.0096734	0.0217755	0.0147216	0.0096521	0.0216281
DJI	Djibouti	2010	164530	0.018729	0.0123777	0.0266895	0.0184551	0.0121971	0.0262452
ERI	Eritrea	2010	988106	0.0127286	0.0063227	0.0221865	0.0125877	0.0062911	0.021867
ETH	Ethiopia	2010	13700000	0.0134739	0.0107114	0.0166229	0.0133353	0.0106187	0.0164081
KEN	Kenya	2010	7020201	0.0066605	0.005285	0.0082228	0.0065972	0.0052208	0.0081525
MDG	Madagascar	2010	3366481	0.0162888	0.0132002	0.0197843	0.0162454	0.0131817	0.0196786
MOZ	Mozambique	2010	3886343	0.0196375	0.0150273	0.0255216	0.0194538	0.0148982	0.0252463
MUS	Mauritius	2010	254574	0.0104525	0.0046002	0.018961	0.0104867	0.0045758	0.0189928
MWI	Malawi	2010	2263163	0.0103842	0.0080582	0.0131345	0.0102146	0.0079481	0.012908
RWA	Rwanda	2010	1911103	0.0066365	0.0051848	0.0082896	0.0066384	0.0051959	0.0082751
SDN	Sudan	2010	7418416	0.0142486	0.0110016	0.0182686	0.0141116	0.0108946	0.018082
SOM	Somalia	2010	1504497	0.0136972	0.0068785	0.0245688	0.0135993	0.0069079	0.0242601
SYC	Seychelles	2010	16508	0.0101716	0.004519	0.0191356	0.0102037	0.0045098	0.019228
TZA	United Republic of Tanzania	2010	7153772	0.0123393	0.0101344	0.015014	0.0121969	0.0100319	0.0148036
UGA	Uganda	2010	5040070	0.0122192	0.0096088	0.014978	0.0120886	0.0095192	0.0147837
ZMB	Zambia	2010	2032612	0.0103294	0.0083183	0.0126782	0.0102426	0.0082658	0.0125544
BWA	Botswana	1990	225513	0.0177576	0.0077435	0.032815	0.0176337	0.0077704	0.0323869
LSO	Lesotho	1990	268735	0.0191465	0.0149383	0.0238841	0.0190674	0.0148646	0.0237464
NAM	Namibia	1990	234792	0.0126532	0.0092559	0.0166656	0.0127722	0.0093883	0.0167907
SWZ	Swaziland	1990	144472	0.0157226	0.0095149	0.0236328	0.0157477	0.0095746	0.0235568
ZAF	South Africa	1990	6505154	0.0167231	0.0111776	0.0236358	0.0168035	0.0112696	0.0236021
ZWE	Zimbabwe	1990	1635063	0.0119697	0.0095828	0.0148048	0.0117914	0.0094534	0.0144997
BWA	Botswana	2010	379070	0.010629	0.0042642	0.0205716	0.0106011	0.0043674	0.0203911
LSO	Lesotho	2010	387135	0.0115947	0.0089927	0.0147703	0.0116044	0.0089955	0.0147296
NAM	Namibia	2010	413067	0.0070773	0.0052016	0.0093739	0.0071758	0.0052852	0.0094857
SWZ	Swaziland	2010	210251	0.0087828	0.0052364	0.0132759	0.0089509	0.0053666	0.0134869
ZAF	South Africa	2010	9657157	0.0095066	0.0061805	0.0139335	0.0095982	0.0062549	0.0139857
ZWE	Zimbabwe	2010	2183203	0.0073263	0.0057576	0.0091181	0.0072369	0.0056953	0.0089697
BEN	Benin	1990	743994	0.0163715	0.0133618	0.0200164	0.0159644	0.0130128	0.0195587
BFA	Burkina Faso	1990	1431696	0.0206141	0.0166433	0.0255927	0.019943	0.0160988	0.0247371
CIV	Côte d'Ivoire	1990	1820106	0.0193541	0.0150322	0.0241727	0.0190862	0.0148133	0.0238082
CMR	Cameroon	1990	1848473	0.0381336	0.0316261	0.0455278	0.0375569	0.0311068	0.0447012
CPV	Cape Verde	1990	54483	0.0227337	0.0119373	0.0392695	0.0220579	0.0117188	0.0381495
GHA	Ghana	1990	2305740	0.0181774	0.0149869	0.0218147	0.01789	0.0147597	0.0214338
GIN	Guinea	1990	882875	0.0271179	0.0210032	0.0341932	0.0265188	0.0205039	0.033468
GMB	Gambia	1990	161848	0.0235256	0.0123335	0.0411425	0.0228121	0.0119981	0.0395851
GNB	Guinea-Bissau	1990	152904	0.0236158	0.0126549	0.0393365	0.0235744	0.0126345	0.0392254
LBR	Liberia	1990	330267	0.0228727	0.0174982	0.0293889	0.022563	0.0172602	0.0290171
MLI	Mali	1990	1282209	0.0301674	0.0249878	0.0358892	0.0292067	0.0241573	0.0346962
MRT	Mauritania	1990	315218	0.0197531	0.0147379	0.0253615	0.0196248	0.0145965	0.0251398
NER	Niger	1990	1213801	0.028426	0.0230278	0.0348465	0.0275939	0.0223258	0.0338309
NGA	Nigeria	1990	14900000	0.0273398	0.0224812	0.0328385	0.0268548	0.0220633	0.0322005
SEN	Senegal	1990	1062110	0.0241791	0.0203178	0.0285596	0.0235811	0.0198152	0.0278854
SLE	Sierra Leone	1990	683798	0.0275048	0.01952	0.0375272	0.0270567	0.0192198	0.0369078
STP	São Tomé and Príncipe	1990	17095	0.0163874	0.0101638	0.0243219	0.0160067	0.009968	0.0237973
TCD	Chad	1990	910851	0.0201277	0.0152144	0.0261558	0.0197168	0.014886	0.0255866
TGO	Togo	1990	559269	0.017144	0.0128134	0.0218556	0.0167906	0.0125404	0.0214508
BEN	Benin	2010	1459822	0.011112	0.0089484	0.0136455	0.0108918	0.0087538	0.0133696
BFA	Burkina Faso	2010	2714538	0.0144667	0.0114683	0.0181055	0.0140898	0.0111746	0.0176169
CIV	Côte d'Ivoire	2010	3193600	0.0127811	0.0097116	0.0164861	0.012616	0.0095706	0.0162727
CMR	Cameroon	2010	3352112	0.0245427	0.0198471	0.0300331	0.0242475	0.0196288	0.029642
CPV	Cape Verde	2010	90338	0.014416	0.0070939	0.0254656	0.0141973	0.0070658	0.0250165
GHA	Ghana	2010	4240320	0.0116199	0.0094367	0.0141841	0.0115385	0.0093507	0.0140423
GIN	Guinea	2010	1596166	0.019084	0.0147519	0.0246141	0.0186159	0.0143771	0.0239164
GMB	Gambia	2010	307529	0.0155285	0.0079536	0.0267716	0.0152712	0.0078794	0.0263816
GNB	Guinea-Bissau	2010	253416	0.0163315	0.0086748	0.0281399	0.0160496	0.0085884	0.0275301
LBR	Liberia	2010	661929	0.0147955	0.0109643	0.0194052	0.0146844	0.0109023	0.0192797
MLI	Mali	2010	2445561	0.0213601	0.0175088	0.0256831	0.0207677	0.0170223	0.0249615
MRT	Mauritania	2010	610037	0.0123536	0.0089498	0.0163422	0.012347	0.0089212	0.0163148
NER	Niger	2010	2305348	0.020036	0.0160982	0.0246016	0.0195357	0.0156746	0.0239691
NGA	Nigeria	2010	25700000	0.0178073	0.0145862	0.0214197	0.0175056	0.014307	0.0210637
SEN	Senegal	2010	2138446	0.0162051	0.0132959	0.0195073	0.0159644	0.0131276	0.0191744
SLE	Sierra Leone	2010	1023807	0.0187205	0.0132503	0.0255763	0.0184762	0.0130812	0.025246
STP	São Tomé and Príncipe	2010	28790	0.0105996	0.0065189	0.0159424	0.0103968	0.0064087	0.0156563
TCD	Chad	2010	1756459	0.0139815	0.0105417	0.0180437	0.0136589	0.0102937	0.0176235
TGO	Togo	2010	1070193	0.0111818	0.0082943	0.0146088	0.0110209	0.0081889	0.01438

## Sheet: Secondary - all women
Prevalence of secondary infertility among all women
County		Year	Total population, women aged 20-44 years	Prevalence of secondary infertility			Age-standardized prevalence of secondary infertility
ISO3 code	Country name			Estimate	Lower 95% uncertainty interval	Upper 95% uncertainty interval	Estimate	Lower 95% uncertainty interval	Upper 95% uncertainty interval
BRN	Brunei Darussalam	1990	48806	0.0192983	0.0059593	0.0447786	0.0200565	0.0061106	0.0468668
JPN	Japan	1990	21800000	0.0211152	0.0065544	0.048799	0.0191344	0.0059001	0.0442453
KOR	Republic of Korea	1990	9041102	0.0207739	0.0118434	0.0327944	0.0224088	0.012775	0.0353473
SGP	Singapore	1990	746131	0.0192132	0.0059438	0.0455575	0.0198218	0.0060999	0.0467738
BRN	Brunei Darussalam	2010	91314	0.0156162	0.0039154	0.0400074	0.0150661	0.0037611	0.0385307
JPN	Japan	2010	20100000	0.0175965	0.0045248	0.0455956	0.0156723	0.0040476	0.0405014
KOR	Republic of Korea	2010	9085255	0.0186803	0.0079766	0.0358199	0.016657	0.0070932	0.0321766
SGP	Singapore	2010	946395	0.0167893	0.0041403	0.043425	0.0149559	0.0036893	0.0388144
ARM	Armenia	1990	705400	0.0461263	0.0310712	0.0654109	0.0475959	0.0322724	0.0672258
AZE	Azerbaijan	1990	1370871	0.0456204	0.0268388	0.0702865	0.0524626	0.0311955	0.08037
GEO	Georgia	1990	1017993	0.0459319	0.0185172	0.0880908	0.0461498	0.0187558	0.0884109
KAZ	Kazakhstan	1990	3129493	0.0427727	0.0293153	0.0578284	0.0439239	0.0301396	0.0594134
KGZ	Kyrgyzstan	1990	761589	0.0571469	0.0364824	0.0828623	0.0630728	0.0404634	0.0907095
MNG	Mongolia	1990	367975	0.0500481	0.0208836	0.0929197	0.0598088	0.0249302	0.110564
TJK	Tajikistan	1990	861779	0.0457403	0.0186924	0.086908	0.0543918	0.0222909	0.102462
TKM	Turkmenistan	1990	643821	0.0459292	0.0189569	0.0872259	0.0526935	0.0216354	0.0983817
UZB	Uzbekistan	1990	3505111	0.0408628	0.0263199	0.0603155	0.0483199	0.0313087	0.0703321
ARM	Armenia	2010	597414	0.0341176	0.0238279	0.0469827	0.0367343	0.025658	0.0504872
AZE	Azerbaijan	2010	1912075	0.0357272	0.0226936	0.0521434	0.0375501	0.0238258	0.0548946
GEO	Georgia	2010	796644	0.0374726	0.0139751	0.0735835	0.0375993	0.0140017	0.0739597
KAZ	Kazakhstan	2010	3179008	0.0313801	0.0206759	0.0466079	0.0326524	0.0215287	0.0484666
KGZ	Kyrgyzstan	2010	1044406	0.046409	0.0276642	0.0706644	0.0515228	0.0308195	0.0781022
MNG	Mongolia	2010	601551	0.0461566	0.018149	0.0900821	0.0491929	0.0193869	0.0960181
TJK	Tajikistan	2010	1261274	0.0357848	0.0138486	0.0741531	0.0412041	0.016047	0.0847403
TKM	Turkmenistan	2010	1016649	0.0367259	0.0141321	0.0755896	0.0396408	0.0153398	0.0810812
UZB	Uzbekistan	2010	5446519	0.0359972	0.020874	0.0553861	0.0394929	0.0230703	0.0606701
PRK	Democratic People's Republic of Korea	1990	3819800	0.0316447	0.0117603	0.0666597	0.0354127	0.0131645	0.0742991
TWN	Taiwan	1990	4137632	0.0323602	0.0113817	0.0685191	0.0344775	0.0120273	0.0726373
PRK	Democratic People's Republic of Korea	2010	4621049	0.0257308	0.0085541	0.0588244	0.0237422	0.0078645	0.0546398
TWN	Taiwan	2010	4526507	0.0240287	0.0072354	0.0553583	0.0223951	0.006715	0.0518203
AFG	Afghanistan	1990	1912520	0.0515645	0.0222271	0.0972741	0.0587499	0.0253273	0.109989
BGD	Bangladesh	1990	16400000	0.0338791	0.0277488	0.0407659	0.0412863	0.0337663	0.0496964
BTN	Bhutan	1990	83780	0.0487131	0.0208478	0.0921222	0.0530666	0.0227702	0.0998323
IND	India	1990	147000000	0.0401514	0.0312351	0.0512709	0.0438644	0.034116	0.0558494
NPL	Nepal	1990	3017931	0.0378527	0.0302492	0.0466855	0.0427603	0.0341802	0.0527087
PAK	Pakistan	1990	17000000	0.0564759	0.0446391	0.0701121	0.0650289	0.0515223	0.0806361
AFG	Afghanistan	2010	4667212	0.0447179	0.0184576	0.0885641	0.0519857	0.0214642	0.102102
BGD	Bangladesh	2010	29700000	0.0255575	0.0196552	0.0321118	0.027211	0.0209251	0.0341786
BTN	Bhutan	2010	135335	0.0338892	0.0131394	0.0665464	0.0385903	0.0150188	0.0757204
IND	India	2010	226000000	0.0257712	0.0188623	0.0343107	0.0269961	0.0197564	0.0359684
NPL	Nepal	2010	5504228	0.0290763	0.0235686	0.0357273	0.0315093	0.0255364	0.038642
PAK	Pakistan	2010	31400000	0.0442236	0.0326558	0.0591091	0.0502169	0.0371953	0.0668242
IDN	Indonesia	1990	32800000	0.0495621	0.0423838	0.0579027	0.0568234	0.0486595	0.0662657
KHM	Cambodia	1990	1726783	0.0514458	0.0390529	0.0662549	0.0573761	0.0435692	0.0737729
LAO	Lao People's Democratic Republic	1990	653839	0.0500201	0.0235755	0.0879981	0.0584241	0.0275296	0.10172
LKA	Sri Lanka	1990	3287496	0.027117	0.0171487	0.0399546	0.0290561	0.0183792	0.0428019
MDV	Maldives	1990	30633	0.0633606	0.0425329	0.0908066	0.0805878	0.0543529	0.114009
MMR	Myanmar	1990	7158896	0.0450091	0.0211231	0.0796063	0.050758	0.0236634	0.0897688
MYS	Malaysia	1990	3394366	0.0371027	0.0240628	0.0534883	0.0406682	0.0263775	0.0584289
PHL	Philippines	1990	10600000	0.0381893	0.0310754	0.0460132	0.0435985	0.0356381	0.0524881
THA	Thailand	1990	11500000	0.0257555	0.0161324	0.0381785	0.0278138	0.0174548	0.0410584
TLS	Timor-Leste	1990	134719	0.0429345	0.0285936	0.0621562	0.049822	0.0331525	0.0717784
VNM	Viet Nam	1990	12200000	0.0143163	0.0095123	0.0202752	0.0167297	0.0111399	0.023628
IDN	Indonesia	2010	49600000	0.0399156	0.0307788	0.0507745	0.0400635	0.0309028	0.0509654
KHM	Cambodia	2010	2700144	0.0423202	0.032652	0.0533275	0.0474838	0.0367159	0.0597157
LAO	Lao People's Democratic Republic	2010	1153956	0.0440806	0.0194915	0.0794756	0.0497677	0.0220908	0.0889394
LKA	Sri Lanka	2010	3975404	0.0206614	0.0119543	0.032897	0.0204099	0.0118036	0.0325284
MDV	Maldives	2010	69409	0.0609903	0.04178	0.0851758	0.0696568	0.0481043	0.0969354
MMR	Myanmar	2010	10100000	0.0400692	0.0173771	0.0763941	0.0403878	0.0175369	0.0769769
MYS	Malaysia	2010	5282778	0.0256657	0.014243	0.0411711	0.0263766	0.014652	0.04229
PHL	Philippines	2010	16900000	0.0334573	0.0261195	0.0419844	0.0362139	0.0283011	0.0454111
THA	Thailand	2010	13700000	0.0211668	0.011961	0.0339022	0.0197565	0.011161	0.0316838
TLS	Timor-Leste	2010	154657	0.0367543	0.0246512	0.0521501	0.0434383	0.0292206	0.0614285
VNM	Viet Nam	2010	18500000	0.0124183	0.0079903	0.0182797	0.0128618	0.0082767	0.0189354
AUS	Australia	1990	3350690	0.0195462	0.0047908	0.0517961	0.0190203	0.0046584	0.050455
NZL	New Zealand	1990	661955	0.0199934	0.0051221	0.0527337	0.0197993	0.0050703	0.0522043
AUS	Australia	2010	3935996	0.0164088	0.0035124	0.047821	0.0157508	0.0033692	0.0461797
NZL	New Zealand	2010	759593	0.0155969	0.0033479	0.0460232	0.0147045	0.0031558	0.043372
ATG	Antigua and Barbuda	1990	11863	0.0227568	0.0083442	0.0469497	0.025526	0.0093524	0.053162
BHS	Bahamas	1990	51215	0.0281296	0.0122083	0.054032	0.0308089	0.01344	0.0589218
BLZ	Belize	1990	30861	0.0291955	0.0183878	0.0435774	0.0370115	0.0234192	0.054912
BRB	Barbados	1990	54938	0.0368796	0.0151726	0.0714441	0.0389532	0.0160941	0.0753291
CUB	Cuba	1990	2138337	0.0273647	0.0105425	0.0552335	0.0306886	0.0118745	0.061783
DMA	Dominica	1990	13528	0.0336834	0.0139162	0.0644259	0.038031	0.0156853	0.0728249
DOM	Dominican Republic	1990	1268920	0.0348482	0.0280473	0.0418345	0.0404058	0.0326691	0.0483867
GRD	Grenada	1990	14536	0.0340762	0.0149127	0.0639174	0.0381049	0.0166942	0.0711034
GUY	Guyana	1990	141994	0.0280119	0.0179407	0.0412111	0.0323221	0.0207548	0.0475071
HTI	Haiti	1990	1165516	0.0524379	0.0417297	0.0643331	0.0596577	0.0477336	0.0730211
JAM	Jamaica	1990	423054	0.0328622	0.021739	0.0477443	0.0386481	0.0256344	0.0560847
LCA	Saint Lucia	1990	23550	0.0300191	0.0123969	0.0588338	0.034811	0.0143568	0.0680763
PRI	Puerto Rico	1990	670622	0.0304277	0.0117817	0.0609802	0.0303218	0.0117374	0.0607936
SUR	Suriname	1990	74816	0.0371145	0.0154184	0.0684618	0.0429767	0.0177419	0.079267
TTO	Trinidad and Tobago	1990	234127	0.0375555	0.0268021	0.0505851	0.0407404	0.0291405	0.0546683
VCT	Saint Vincent and the Grenadines	1990	18040	0.0317637	0.0135778	0.062188	0.0381896	0.0164843	0.0746387
ATG	Antigua and Barbuda	2010	17722	0.0203926	0.0070024	0.0438248	0.0191367	0.0065579	0.0411388
BHS	Bahamas	2010	68519	0.022998	0.0095497	0.0464056	0.0227154	0.0094515	0.0457853
BLZ	Belize	2010	57898	0.0263446	0.0157311	0.0412059	0.0289597	0.0173171	0.0452982
BRB	Barbados	2010	48581	0.0289976	0.0110003	0.0597534	0.0271746	0.0102571	0.0562475
CUB	Cuba	2010	2097016	0.0245893	0.0090612	0.0513464	0.0219854	0.008059	0.0457968
DMA	Dominica	2010	13536	0.028314	0.0106891	0.0565844	0.0264724	0.0099921	0.0528801
DOM	Dominican Republic	2010	1839056	0.0254281	0.0194203	0.031938	0.0266021	0.0203269	0.0333989
GRD	Grenada	2010	19806	0.0220233	0.0086493	0.0437435	0.0265032	0.010426	0.0520377
GUY	Guyana	2010	137436	0.0209506	0.0126369	0.0324237	0.0208467	0.0125728	0.0322541
HTI	Haiti	2010	1830740	0.0387004	0.0296967	0.0493946	0.0448994	0.0344848	0.0570911
JAM	Jamaica	2010	504850	0.0298758	0.0188935	0.0444193	0.0293958	0.0185807	0.0437993
LCA	Saint Lucia	2010	36090	0.0248496	0.009296	0.0516839	0.025991	0.0097354	0.0539638
PRI	Puerto Rico	2010	677170	0.0222668	0.0078631	0.0459684	0.0215592	0.0075999	0.0444584
SUR	Suriname	2010	98754	0.0330256	0.0124789	0.0649538	0.0334458	0.0126626	0.0657242
TTO	Trinidad and Tobago	2010	287698	0.0282834	0.019011	0.0404419	0.0294765	0.0198224	0.042127
VCT	Saint Vincent and the Grenadines	2010	20474	0.0255201	0.009757	0.0524198	0.026614	0.0101911	0.05467
ALB	Albania	1990	599992	0.0266675	0.0160371	0.0402783	0.0303576	0.0182752	0.0455704
BGR	Bulgaria	1990	1520669	0.0429882	0.0165805	0.0880873	0.0401163	0.0153934	0.0825942
BIH	Bosnia and Herzegovina	1990	855854	0.0593764	0.0248535	0.113874	0.0605768	0.0253687	0.115659
CZE	Czech Republic	1990	1831850	0.0567437	0.035414	0.0851065	0.0521099	0.0324803	0.0787005
HRV	Croatia	1990	815400	0.0527427	0.0213635	0.0992377	0.0494872	0.0199826	0.0934759
HUN	Hungary	1990	1812097	0.044561	0.0172957	0.0853941	0.0407933	0.0158012	0.0788635
MKD	Macedonia (Former Yugoslav Republic of)	1990	363000	0.0495949	0.020246	0.0953423	0.0493935	0.0201712	0.0950103
MNE	Montenegro	1990	111382	0.0459728	0.0187053	0.0898173	0.0453281	0.0184355	0.0886113
POL	Poland	1990	7099019	0.0395704	0.0256883	0.0567481	0.0365229	0.0236899	0.0524262
ROU	Romania	1990	4059711	0.0421737	0.0176996	0.0827416	0.0416001	0.0174443	0.0816764
SRB	Serbia	1990	1701112	0.0528288	0.022038	0.10022	0.0500919	0.020885	0.0950017
SVK	Slovakia	1990	970225	0.0448891	0.0179044	0.0886116	0.0432106	0.0172034	0.0853444
SVN	Slovenia	1990	362168	0.0339787	0.0204653	0.0524706	0.0325601	0.0196043	0.0503422
ALB	Albania	2010	613960	0.0219803	0.0147627	0.0303155	0.0231498	0.0155458	0.0319103
BGR	Bulgaria	2010	1312499	0.0325678	0.0116634	0.0678342	0.0307893	0.0109872	0.0640373
BIH	Bosnia and Herzegovina	2010	720627	0.0439432	0.0165202	0.0868526	0.0420218	0.015741	0.0829801
CZE	Czech Republic	2010	1921236	0.0442819	0.026549	0.0686023	0.04167	0.0249076	0.0646448
HRV	Croatia	2010	739244	0.0362922	0.0138296	0.0744259	0.0343668	0.0130476	0.0703548
HUN	Hungary	2010	1790311	0.0342496	0.0118959	0.0712172	0.0319755	0.0110742	0.0666286
MKD	Macedonia (Former Yugoslav Republic of)	2010	382723	0.0362821	0.0132464	0.0754854	0.0354269	0.0129234	0.0738041
MNE	Montenegro	2010	114758	0.0339034	0.0125381	0.0715551	0.0335922	0.0124209	0.0709247
POL	Poland	2010	7055315	0.0293017	0.0162138	0.0476865	0.0294803	0.0163437	0.0479751
ROU	Romania	2010	4208905	0.0321758	0.0120482	0.0678036	0.0305262	0.011391	0.0646292
SRB	Serbia	2010	1744876	0.0384312	0.0151384	0.0792593	0.0373068	0.0146832	0.0769909
SVK	Slovakia	2010	1057224	0.0317064	0.0116702	0.0665556	0.0310723	0.0114274	0.0652445
SVN	Slovenia	2010	353876	0.0237691	0.013306	0.0387452	0.0222301	0.0123992	0.0362841
BLR	Belarus	1990	1877708	0.0465881	0.0175466	0.0934827	0.0452505	0.0170345	0.0906219
EST	Estonia	1990	280205	0.0519832	0.0208918	0.105004	0.0490848	0.0196823	0.0992816
LTU	Lithuania	1990	673391	0.0495006	0.0311582	0.0711181	0.048971	0.0308452	0.0703849
LVA	Latvia	1990	468815	0.0452726	0.0172577	0.0908251	0.0442267	0.0168637	0.0886041
MDA	Moldova	1990	822914	0.0527098	0.0355727	0.0731607	0.0504872	0.0341841	0.0701407
RUS	Russian Federation	1990	27800000	0.0470266	0.0178988	0.0951459	0.0441595	0.0167328	0.0894811
UKR	Ukraine	1990	9123935	0.0374134	0.0243968	0.053502	0.0356555	0.0232346	0.0510778
BLR	Belarus	2010	1832751	0.0358947	0.0129644	0.0745121	0.0355524	0.0128072	0.0739661
EST	Estonia	2010	240767	0.0396394	0.0150988	0.0858524	0.0393024	0.0149255	0.084729
LTU	Lithuania	2010	601830	0.0386997	0.0236839	0.0590923	0.0383427	0.0234493	0.0586529
LVA	Latvia	2010	411264	0.0353908	0.0126302	0.0728449	0.0352765	0.012575	0.0728959
MDA	Moldova	2010	676652	0.0358412	0.024507	0.0502039	0.0381824	0.0261274	0.0534462
RUS	Russian Federation	2010	27700000	0.0318621	0.0113794	0.0698226	0.0322051	0.0115155	0.0706338
UKR	Ukraine	2010	8505447	0.0271584	0.0187468	0.0381218	0.0268252	0.0185069	0.0376654
AND	Andorra	1990	9450	0.0148624	0.0052741	0.0332051	0.0151506	0.0053776	0.0338447
AUT	Austria	1990	1445226	0.0165697	0.0056667	0.035151	0.0168546	0.0057635	0.0357193
BEL	Belgium	1990	1837513	0.0204118	0.0126122	0.0310828	0.0197832	0.0122107	0.0301664
CHE	Switzerland	1990	1279589	0.0148787	0.0052584	0.0322275	0.0143692	0.0050851	0.0311144
CYP	Cyprus	1990	142854	0.0139024	0.0046589	0.0306614	0.0140205	0.004701	0.0309058
DEU	Germany	1990	14500000	0.0156369	0.007616	0.0287822	0.0160312	0.0077981	0.0295121
DNK	Denmark	1990	949780	0.0152116	0.006835	0.0270219	0.0145421	0.0065724	0.0258022
ESP	Spain	1990	6963284	0.0155655	0.0096574	0.022986	0.0158681	0.009847	0.0234359
FIN	Finland	1990	956735	0.011379	0.0069352	0.0175411	0.0104189	0.006345	0.0160945
FRA	France	1990	10600000	0.0183431	0.0064869	0.0393719	0.0175693	0.0062125	0.0377894
GBR	United Kingdom	1990	10600000	0.0134729	0.0047849	0.0283027	0.0133384	0.0047407	0.0280295
GRC	Greece	1990	1780389	0.0171509	0.0063801	0.036302	0.0169016	0.006277	0.0357868
IRL	Ireland	1990	613993	0.0150831	0.00532	0.0336966	0.0149441	0.0052703	0.0333881
ISL	Iceland	1990	48394	0.0149704	0.0056369	0.0327678	0.0151351	0.0056989	0.0330813
ISR	Israel	1990	790841	0.0138874	0.0045002	0.0295614	0.0137893	0.0044657	0.0293384
ITA	Italy	1990	10400000	0.0158991	0.010108	0.0238664	0.0158421	0.0100661	0.0237647
LUX	Luxembourg	1990	74231	0.0176162	0.0065361	0.0369969	0.0170534	0.006321	0.0358238
MLT	Malta	1990	72947	0.0167042	0.0060735	0.0356587	0.0151984	0.0055354	0.032603
NLD	Netherlands	1990	2977799	0.0170994	0.0063728	0.036515	0.0167312	0.0062284	0.0356848
NOR	Norway	1990	778370	0.0129902	0.0041613	0.0288513	0.0126435	0.0040416	0.0279759
PRT	Portugal	1990	1764646	0.0192544	0.0113523	0.0297028	0.0190326	0.0112117	0.029366
SWE	Sweden	1990	1482688	0.0137428	0.0046412	0.0299809	0.0129905	0.0043867	0.0283942
AND	Andorra	2010	15754	0.0124105	0.0039567	0.0286335	0.0110395	0.0035085	0.0255053
AUT	Austria	2010	1441953	0.0143691	0.0048636	0.0326749	0.0130574	0.0044059	0.0297054
BEL	Belgium	2010	1745875	0.0161525	0.0087552	0.0280216	0.0149184	0.0080744	0.0258494
CHE	Switzerland	2010	1329228	0.013816	0.0043458	0.0320238	0.0123514	0.0038847	0.0285553
CYP	Cyprus	2010	208435	0.0098395	0.0029624	0.0243965	0.0098638	0.0029689	0.0244534
DEU	Germany	2010	13200000	0.0133696	0.0059797	0.0274279	0.0121693	0.0054266	0.0249869
DNK	Denmark	2010	886726	0.0134554	0.0054804	0.0256765	0.0121696	0.0049321	0.0236382
ESP	Spain	2010	8553943	0.0110349	0.0062102	0.0179611	0.009817	0.0055065	0.0160123
FIN	Finland	2010	817073	0.0082305	0.0042339	0.0145594	0.0078246	0.0040221	0.0138726
FRA	France	2010	10200000	0.0137067	0.0043802	0.0317842	0.0128638	0.0041048	0.0299576
GBR	United Kingdom	2010	10500000	0.0110738	0.0035492	0.0255628	0.0104103	0.0033325	0.0241509
GRC	Greece	2010	1991775	0.013005	0.0043352	0.0299462	0.0116356	0.0038693	0.0267076
IRL	Ireland	2010	842869	0.0117418	0.0037595	0.0274465	0.011103	0.0035501	0.02598
ISL	Iceland	2010	55438	0.0112544	0.0036759	0.0256003	0.0110302	0.0036001	0.025145
ISR	Israel	2010	1289316	0.0103504	0.003052	0.024126	0.0103449	0.0030541	0.0241222
ITA	Italy	2010	10100000	0.0134608	0.0078721	0.0211985	0.0117165	0.0068314	0.0185724
LUX	Luxembourg	2010	92117	0.0145044	0.0048687	0.0337361	0.0130317	0.004362	0.030605
MLT	Malta	2010	71143	0.0111209	0.0036717	0.0269568	0.0111616	0.0036799	0.0271038
NLD	Netherlands	2010	2701428	0.0137139	0.0045629	0.0318148	0.012377	0.0041121	0.0289446
NOR	Norway	2010	809932	0.0098605	0.0028935	0.0236795	0.009064	0.0026583	0.0217007
PRT	Portugal	2010	1886590	0.0136062	0.0065199	0.0251189	0.0122735	0.0058769	0.0226359
SWE	Sweden	2010	1503332	0.0109947	0.0032179	0.0257766	0.0103389	0.0030279	0.0243348
BOL	Bolivia	1990	1107977	0.0250923	0.0201219	0.0310793	0.0281526	0.0226128	0.034803
ECU	Ecuador	1990	1774552	0.0231004	0.0184362	0.0289803	0.0262966	0.0210164	0.0329099
PER	Peru	1990	3770586	0.0170311	0.0137084	0.0209005	0.0194121	0.0156455	0.0237535
BOL	Bolivia	2010	1752051	0.0188782	0.0149028	0.0237022	0.0204554	0.0161475	0.0256356
ECU	Ecuador	2010	2747366	0.0184087	0.0137877	0.0240148	0.0193414	0.0145025	0.0252052
PER	Peru	2010	5543150	0.0130366	0.0096804	0.0170906	0.0136336	0.0101104	0.01789
COL	Colombia	1990	6382337	0.0182259	0.0149894	0.0219006	0.0204744	0.0168544	0.0246192
CRI	Costa Rica	1990	576743	0.0196248	0.0124836	0.0293821	0.0218251	0.0139066	0.0327315
GTM	Guatemala	1990	1334398	0.0440989	0.0330397	0.0564709	0.0500328	0.037523	0.0640065
HND	Honduras	1990	771005	0.0311732	0.0236356	0.0400921	0.0374547	0.0285165	0.0481116
MEX	Mexico	1990	14600000	0.0232335	0.0164495	0.0313106	0.0272006	0.0192758	0.0365502
NIC	Nicaragua	1990	638056	0.0250313	0.0182249	0.0337224	0.0300218	0.0218462	0.040098
PAN	Panama	1990	439797	0.0237914	0.0148042	0.0351185	0.0267967	0.016711	0.0393603
SLV	El Salvador	1990	878811	0.0221709	0.0172995	0.0277942	0.0257441	0.0201108	0.0322535
VEN	Venezuela (Bolivarian Republic of)	1990	3588059	0.0200413	0.0128319	0.0295433	0.0220738	0.0140872	0.0324743
COL	Colombia	2010	9018195	0.015292	0.0120946	0.0192988	0.0154397	0.0122037	0.0194872
CRI	Costa Rica	2010	913606	0.0146103	0.0085634	0.0234042	0.0152037	0.0089067	0.0243523
GTM	Guatemala	2010	2489109	0.0362657	0.0255422	0.0488753	0.041219	0.0291555	0.0554483
HND	Honduras	2010	1388245	0.024991	0.0188842	0.0324618	0.0281925	0.0214132	0.0366588
MEX	Mexico	2010	22200000	0.018803	0.0121938	0.0269513	0.0189509	0.0122941	0.0271479
NIC	Nicaragua	2010	1100139	0.0203283	0.0144157	0.0273953	0.0227567	0.0161654	0.0306644
PAN	Panama	2010	664841	0.0194705	0.0115012	0.0298784	0.0193987	0.0114602	0.0297551
SLV	El Salvador	2010	1194261	0.0168461	0.0127597	0.0221594	0.0181573	0.0137541	0.023875
VEN	Venezuela (Bolivarian Republic of)	2010	5522082	0.0141923	0.0084938	0.0216813	0.0147779	0.0088353	0.0225458
ARG	Argentina	1990	5543327	0.0279737	0.0083511	0.0664055	0.0280683	0.0083761	0.0665909
CHL	Chile	1990	2614130	0.0256329	0.0071447	0.0602684	0.0276276	0.0076958	0.0649869
URY	Uruguay	1990	528700	0.0283394	0.0083475	0.0671478	0.0284703	0.0083794	0.0674623
ARG	Argentina	2010	7377629	0.0211384	0.0058389	0.0527196	0.0215128	0.0059435	0.05362
CHL	Chile	2010	3193049	0.0206867	0.0052206	0.0524967	0.0204196	0.0051355	0.0513323
URY	Uruguay	2010	577893	0.0222867	0.0059098	0.0569833	0.0218127	0.0057759	0.0557525
BRA	Brazil	1990	28300000	0.0204726	0.0148397	0.026899	0.0223949	0.0162656	0.029384
PRY	Paraguay	1990	703802	0.033402	0.0244786	0.0446795	0.0378105	0.0277943	0.0504496
BRA	Brazil	2010	39200000	0.014698	0.0097059	0.0201824	0.0148391	0.0098096	0.0203719
PRY	Paraguay	2010	1170324	0.0243134	0.0166557	0.0338872	0.0271225	0.018593	0.0377674
ARE	United Arab Emirates	1990	243154	0.0284014	0.0122547	0.052522	0.0301096	0.0129451	0.0554614
BHR	Bahrain	1990	87717	0.0269122	0.0119562	0.0512942	0.0314991	0.0139801	0.0595281
DZA	Algeria	1990	4055537	0.0334882	0.0250408	0.043293	0.0401965	0.0300882	0.0518552
EGY	Egypt	1990	9375821	0.0257663	0.0215042	0.0303293	0.0279649	0.0233561	0.032931
IRN	Iran (Islamic Republic of)	1990	8488443	0.0325528	0.0158356	0.0607596	0.0379317	0.0184615	0.0707022
IRQ	Iraq	1990	2628040	0.0333426	0.0160292	0.0594428	0.0406593	0.0195526	0.0722323
JOR	Jordan	1990	446547	0.0253374	0.0199817	0.0317898	0.0319834	0.0252584	0.0400457
KWT	Kuwait	1990	399765	0.0309698	0.0142579	0.0589795	0.034185	0.015685	0.0646497
LBN	Lebanon	1990	555461	0.0361213	0.0262496	0.0475115	0.0409584	0.0297552	0.053626
LBY	Libyan Arab Jamahiriya	1990	635537	0.0357981	0.0236836	0.050821	0.0441682	0.0293339	0.062516
MAR	Morocco	1990	4293180	0.0323681	0.0260542	0.039487	0.0375577	0.0303251	0.0458359
OMN	Oman	1990	236780	0.0352954	0.0167241	0.0647671	0.0392792	0.0186137	0.0718589
PSE	Occupied Palestinian Territory	1990	310591	0.0250479	0.0111206	0.0472925	0.0304662	0.0135145	0.0573049
QAT	Qatar	1990	63967	0.0321145	0.0145313	0.0607874	0.0318874	0.0144161	0.060261
SAU	Saudi Arabia	1990	2294133	0.0317198	0.0144747	0.0598356	0.0390925	0.0178516	0.0722816
SYR	Syrian Arab Republic	1990	1857064	0.0315052	0.0240957	0.0403557	0.0394016	0.030194	0.0503423
TUN	Tunisia	1990	1423484	0.026017	0.0198068	0.0333161	0.0307111	0.0234249	0.039338
TUR	Turkey	1990	9804430	0.0239793	0.0190702	0.0295578	0.0266371	0.0212063	0.0327434
YEM	Yemen	1990	1658958	0.0529737	0.0404014	0.0669866	0.0621122	0.047517	0.0784384
ARE	United Arab Emirates	2010	1259902	0.0177529	0.0069477	0.0344786	0.0196335	0.0076809	0.0381064
BHR	Bahrain	2010	232985	0.0203279	0.0079275	0.0419531	0.0210878	0.0082216	0.0433714
DZA	Algeria	2010	7573851	0.0302036	0.0218418	0.0397261	0.032591	0.0235715	0.0428406
EGY	Egypt	2010	15200000	0.0178382	0.0140544	0.0221954	0.0198832	0.0156664	0.0247581
IRN	Iran (Islamic Republic of)	2010	17100000	0.0241107	0.0103668	0.0487059	0.027673	0.0119114	0.0556391
IRQ	Iraq	2010	5295070	0.0326008	0.0143072	0.0625417	0.0359853	0.0157733	0.0689524
JOR	Jordan	2010	1126787	0.0210932	0.0163689	0.0267928	0.0248948	0.0193385	0.0316099
KWT	Kuwait	2010	517244	0.0246602	0.0103093	0.0489141	0.0252703	0.0105171	0.0501908
LBN	Lebanon	2010	868531	0.028634	0.0202638	0.0393119	0.0284932	0.0201665	0.0391179
LBY	Libyan Arab Jamahiriya	2010	1369810	0.0341794	0.0216618	0.0503169	0.0362201	0.0229162	0.0530082
MAR	Morocco	2010	6609684	0.0284584	0.0217638	0.037123	0.0301361	0.0230636	0.0392917
OMN	Oman	2010	502377	0.0236856	0.0102127	0.045496	0.0280626	0.0120303	0.054215
PSE	Occupied Palestinian Territory	2010	658667	0.0183648	0.0070964	0.0371969	0.0207045	0.0080045	0.0417955
QAT	Qatar	2010	230487	0.0215922	0.0086799	0.0431343	0.022275	0.0089768	0.0447677
SAU	Saudi Arabia	2010	5061035	0.0255165	0.0106511	0.049875	0.0273073	0.0114031	0.0535514
SYR	Syrian Arab Republic	2010	3613925	0.0276662	0.0198853	0.0373033	0.0300661	0.0216447	0.0405254
TUN	Tunisia	2010	2212832	0.0219519	0.0157321	0.0307291	0.0228421	0.0163562	0.0319925
TUR	Turkey	2010	14700000	0.0166044	0.0120915	0.0222094	0.0167852	0.0122259	0.0224481
YEM	Yemen	2010	3869641	0.0482195	0.0359431	0.0623982	0.061054	0.0457019	0.0785424
CAN	Canada	1990	5746364	0.0135552	0.0041015	0.0316176	0.0130893	0.0039628	0.0305495
USA	United States of America	1990	50800000	0.0103235	0.0070841	0.0141735	0.0099354	0.0068137	0.0136409
CAN	Canada	2010	5764270	0.0108783	0.0028112	0.0268675	0.0103256	0.0026693	0.0255594
USA	United States of America	2010	51400000	0.0092887	0.0060523	0.0139452	0.0089472	0.0058268	0.0134403
FJI	Fiji	1990	133544	0.0390113	0.0246147	0.0578634	0.0430337	0.0271971	0.0636806
FSM	Micronesia (Federated States of)	1990	15167	0.0412494	0.0155026	0.0868749	0.0478952	0.0180407	0.0992938
KIR	Kiribati	1990	13990	0.0411853	0.015086	0.0834414	0.0459244	0.0168758	0.0920888
MHL	Marshall Islands	1990	9210	0.041688	0.0158793	0.0857113	0.0464816	0.0177761	0.0948114
PNG	Papua New Guinea	1990	676209	0.060082	0.0246343	0.117456	0.0678122	0.0278956	0.131512
SLB	Solomon Islands	1990	46353	0.0528085	0.0199632	0.102966	0.0598235	0.0227665	0.116031
TON	Tonga	1990	15617	0.029974	0.0097312	0.0656718	0.0365311	0.011928	0.0798772
VUT	Vanuatu	1990	24274	0.0484113	0.0177244	0.0961036	0.0545263	0.0199973	0.107523
WSM	Samoa	1990	23710	0.0310483	0.0107607	0.0666083	0.0359611	0.0125409	0.0771544
FJI	Fiji	2010	159746	0.0304561	0.0167931	0.0492601	0.0317791	0.0175569	0.0514091
FSM	Micronesia (Federated States of)	2010	18514	0.0291711	0.0093642	0.066408	0.0346562	0.0112071	0.0781561
KIR	Kiribati	2010	19704	0.0337729	0.0108727	0.0732548	0.0319442	0.0102679	0.069599
MHL	Marshall Islands	2010	10696	0.0388398	0.0127867	0.0858891	0.036713	0.0120868	0.0815408
PNG	Papua New Guinea	2010	1209857	0.0519403	0.018735	0.105392	0.0554769	0.0200057	0.11155
SLB	Solomon Islands	2010	92254	0.0424329	0.0142842	0.0916962	0.0465168	0.0156276	0.100808
TON	Tonga	2010	17549	0.0257495	0.0073235	0.06035	0.0267627	0.0075674	0.0626283
VUT	Vanuatu	2010	41925	0.0382992	0.0125563	0.080967	0.0417943	0.013808	0.0877047
WSM	Samoa	2010	28213	0.0253434	0.0078418	0.059982	0.0257309	0.0079651	0.0608723
AGO	Angola	1990	1590953	0.0981486	0.0464718	0.167586	0.113246	0.0541804	0.191126
CAF	Central African Republic	1990	460894	0.128884	0.093415	0.17083	0.14343	0.104658	0.189194
COD	Democratic Republic of the Congo	1990	5506181	0.0727945	0.0539946	0.0925998	0.0818446	0.0609199	0.10375
COG	Congo	1990	371397	0.0867843	0.0611219	0.116759	0.0991555	0.0702443	0.132526
GAB	Gabon	1990	150056	0.116186	0.0820396	0.154305	0.127954	0.0912614	0.168225
GNQ	Equatorial Guinea	1990	68867	0.0823796	0.0384868	0.142271	0.104428	0.0503371	0.176661
AGO	Angola	2010	2986395	0.0699583	0.0309089	0.125017	0.0811422	0.0360714	0.144168
CAF	Central African Republic	2010	748588	0.0900275	0.0618194	0.124048	0.105989	0.0736812	0.144473
COD	Democratic Republic of the Congo	2010	10200000	0.046997	0.0348631	0.0612649	0.0549855	0.0409152	0.0714665
COG	Congo	2010	700868	0.0586241	0.0397632	0.0822136	0.0653703	0.04449	0.0907951
GAB	Gabon	2010	270331	0.0746404	0.0500418	0.100569	0.082186	0.055434	0.110618
GNQ	Equatorial Guinea	2010	111291	0.0667135	0.0293735	0.119434	0.0707434	0.030981	0.126137
BDI	Burundi	1990	954963	0.0522253	0.035627	0.0717204	0.0609945	0.0417856	0.0833257
COM	Comoros	1990	66803	0.075864	0.0531175	0.104041	0.0900279	0.0635612	0.122689
DJI	Djibouti	1990	91625	0.124806	0.0881028	0.170747	0.141724	0.10102	0.192172
ERI	Eritrea	1990	476501	0.0800252	0.0400099	0.13552	0.0860655	0.0431829	0.145249
ETH	Ethiopia	1990	7625655	0.0622342	0.0476692	0.0773947	0.0707221	0.0544046	0.0878387
KEN	Kenya	1990	3500869	0.0460214	0.0387837	0.0549019	0.055545	0.0468853	0.0661449
MDG	Madagascar	1990	1771809	0.0615387	0.0500856	0.0743929	0.0722414	0.0589331	0.0868725
MOZ	Mozambique	1990	2081245	0.112277	0.0905075	0.134416	0.125482	0.101659	0.149858
MUS	Mauritius	1990	218736	0.0578272	0.0290426	0.100307	0.0648988	0.0327202	0.112246
MWI	Malawi	1990	1558417	0.0750908	0.0602022	0.0922626	0.0842626	0.0677292	0.103257
RWA	Rwanda	1990	1071891	0.0299938	0.0237352	0.0379325	0.0347413	0.0275003	0.0438515
SDN	Sudan	1990	4188173	0.0815593	0.0646921	0.0993731	0.0917196	0.0729421	0.111471
SOM	Somalia	1990	1070210	0.0775041	0.0406974	0.12915	0.089795	0.0473061	0.148147
SYC	Seychelles	1990	12587	0.0471502	0.0223817	0.0868451	0.0561901	0.0268763	0.101758
TZA	United Republic of Tanzania	1990	3979123	0.0828869	0.0691413	0.0981719	0.0946527	0.0790967	0.111644
UGA	Uganda	1990	2648999	0.0575349	0.0462861	0.069549	0.0675561	0.0544518	0.0814389
ZMB	Zambia	1990	1215486	0.0611361	0.0498312	0.0753045	0.0709678	0.0580024	0.0871127
BDI	Burundi	2010	1558104	0.0369037	0.0243965	0.05292	0.0458518	0.0305214	0.0654553
COM	Comoros	2010	126718	0.0532409	0.0356287	0.0764084	0.0596479	0.039813	0.0850185
DJI	Djibouti	2010	164530	0.0963692	0.0666403	0.134569	0.108456	0.0753666	0.150811
ERI	Eritrea	2010	988106	0.0520281	0.0242498	0.0908023	0.0615451	0.0289588	0.105724
ETH	Ethiopia	2010	13700000	0.0457396	0.035643	0.0567157	0.053102	0.0415105	0.0656652
KEN	Kenya	2010	7020201	0.02707	0.0214561	0.033318	0.0330939	0.0263503	0.0406427
MDG	Madagascar	2010	3366481	0.0447035	0.036269	0.0548085	0.049759	0.040467	0.060967
MOZ	Mozambique	2010	3886343	0.0862297	0.0680959	0.105939	0.0964417	0.0761927	0.118398
MUS	Mauritius	2010	254574	0.039315	0.017255	0.0738623	0.0375321	0.016492	0.0706193
MWI	Malawi	2010	2263163	0.0479302	0.0372791	0.059228	0.0587415	0.0458249	0.0727875
RWA	Rwanda	2010	1911103	0.0195954	0.0151947	0.0251028	0.0241649	0.0187715	0.0309237
SDN	Sudan	2010	7418416	0.0561205	0.0427452	0.0718958	0.0626696	0.0478335	0.0801387
SOM	Somalia	2010	1504497	0.0642903	0.0315555	0.110758	0.0710175	0.0350067	0.122034
SYC	Seychelles	2010	16508	0.0357581	0.0146051	0.06723	0.0340298	0.0139016	0.0640699
TZA	United Republic of Tanzania	2010	7153772	0.0570645	0.047011	0.068876	0.0680503	0.0563267	0.0816373
UGA	Uganda	2010	5040070	0.0379767	0.0298848	0.0470276	0.0471832	0.037215	0.0583035
ZMB	Zambia	2010	2032612	0.0405191	0.0322723	0.0509163	0.0501072	0.039916	0.0625527
BWA	Botswana	1990	225513	0.0586662	0.0274673	0.104847	0.0672044	0.0316318	0.119145
LSO	Lesotho	1990	268735	0.0641986	0.0504152	0.0800685	0.071529	0.0563667	0.0891573
NAM	Namibia	1990	234792	0.0401683	0.0310716	0.0514585	0.0467107	0.0362506	0.0595944
SWZ	Swaziland	1990	144472	0.044612	0.0292453	0.0632131	0.0514678	0.0338021	0.0724814
ZAF	South Africa	1990	6505154	0.0438184	0.0295166	0.0619981	0.0482894	0.0327302	0.0680356
ZWE	Zimbabwe	1990	1635063	0.0469119	0.0377808	0.0565358	0.0567035	0.0456937	0.0683004
BWA	Botswana	2010	379070	0.0330918	0.0142914	0.0627244	0.0401109	0.0172322	0.0755383
LSO	Lesotho	2010	387135	0.0344481	0.0268326	0.0440196	0.0435373	0.034098	0.0555737
NAM	Namibia	2010	413067	0.0234223	0.0175214	0.0301982	0.026217	0.0196298	0.0337421
SWZ	Swaziland	2010	210251	0.0216955	0.0138808	0.0326169	0.0276568	0.0176691	0.0412494
ZAF	South Africa	2010	9657157	0.0241397	0.0155688	0.0360372	0.026424	0.0170981	0.0393436
ZWE	Zimbabwe	2010	2183203	0.0240893	0.0190891	0.0295811	0.0343135	0.0273121	0.042035
BEN	Benin	1990	743994	0.0754077	0.0615359	0.0909515	0.0864598	0.0707507	0.104066
BFA	Burkina Faso	1990	1431696	0.0744733	0.0605607	0.0895439	0.0866377	0.0706438	0.104009
CIV	Côte d'Ivoire	1990	1820106	0.0918622	0.0735211	0.114045	0.104086	0.0835929	0.128299
CMR	Cameroon	1990	1848473	0.110285	0.0912479	0.130923	0.124272	0.103426	0.147016
CPV	Cape Verde	1990	54483	0.0776387	0.0410078	0.127986	0.10148	0.0545775	0.163332
GHA	Ghana	1990	2305740	0.0792715	0.0657811	0.0936354	0.0913102	0.0759273	0.107372
GIN	Guinea	1990	882875	0.123802	0.0984398	0.151114	0.139629	0.111885	0.169099
GMB	Gambia	1990	161848	0.0856578	0.046768	0.142078	0.10961	0.0614399	0.17803
GNB	Guinea-Bissau	1990	152904	0.110274	0.0629518	0.178796	0.114027	0.0653904	0.183769
LBR	Liberia	1990	330267	0.111066	0.0867099	0.137001	0.127941	0.100463	0.157009
MLI	Mali	1990	1282209	0.103614	0.0857754	0.122222	0.11933	0.099043	0.14026
MRT	Mauritania	1990	315218	0.0830751	0.0647246	0.105674	0.0956223	0.0748664	0.120885
NER	Niger	1990	1213801	0.0964191	0.0774618	0.11916	0.109852	0.0886801	0.135223
NGA	Nigeria	1990	14900000	0.108996	0.0920401	0.126507	0.121974	0.103202	0.141387
SEN	Senegal	1990	1062110	0.0859872	0.0734694	0.100441	0.101674	0.0870217	0.118311
SLE	Sierra Leone	1990	683798	0.133271	0.0977974	0.172734	0.147174	0.108817	0.189786
STP	São Tomé and Príncipe	1990	17095	0.0622813	0.0423814	0.0893093	0.0762579	0.0524641	0.108306
TCD	Chad	1990	910851	0.11823	0.0999277	0.138842	0.134079	0.113741	0.15702
TGO	Togo	1990	559269	0.069172	0.0528162	0.0870552	0.0802045	0.0615191	0.100562
BEN	Benin	2010	1459822	0.0578798	0.0461596	0.0708995	0.0663904	0.05305	0.0811564
BFA	Burkina Faso	2010	2714538	0.0604994	0.0487633	0.0739139	0.0704962	0.0570426	0.0858991
CIV	Côte d'Ivoire	2010	3193600	0.065564	0.0504531	0.0829261	0.0782972	0.0605724	0.0982905
CMR	Cameroon	2010	3352112	0.0740026	0.0595125	0.0902381	0.0860385	0.0695713	0.104361
CPV	Cape Verde	2010	90338	0.0610077	0.0305594	0.10465	0.0696568	0.0350049	0.118796
GHA	Ghana	2010	4240320	0.0574617	0.0468416	0.0686885	0.0639186	0.052192	0.076129
GIN	Guinea	2010	1596166	0.0991304	0.0778948	0.122305	0.114264	0.0903425	0.140155
GMB	Gambia	2010	307529	0.0716731	0.0376868	0.123477	0.083693	0.0443006	0.142447
GNB	Guinea-Bissau	2010	253416	0.0763432	0.0410408	0.129984	0.0900765	0.0490056	0.150817
LBR	Liberia	2010	661929	0.08314	0.0639013	0.105182	0.0949898	0.0733664	0.119748
MLI	Mali	2010	2445561	0.0839172	0.0689723	0.101532	0.0983359	0.0811906	0.11869
MRT	Mauritania	2010	610037	0.0619216	0.0460805	0.0821628	0.0684079	0.0511347	0.090453
NER	Niger	2010	2305348	0.0790879	0.0627607	0.0976899	0.0909388	0.0724887	0.111981
NGA	Nigeria	2010	25700000	0.0747161	0.0627506	0.0877088	0.0867789	0.0731171	0.101612
SEN	Senegal	2010	2138446	0.068316	0.0560503	0.0830057	0.0788236	0.0649616	0.0953993
SLE	Sierra Leone	2010	1023807	0.105005	0.0765034	0.139051	0.116306	0.0852209	0.15289
STP	São Tomé and Príncipe	2010	28790	0.0432681	0.02883	0.062889	0.0533905	0.0356611	0.0770447
TCD	Chad	2010	1756459	0.0935444	0.0771662	0.112544	0.110257	0.0914614	0.131899
TGO	Togo	2010	1070193	0.0497628	0.0359595	0.0647107	0.0577074	0.0417889	0.074686
